# Supplementary material for: Polymorphism in the Vesicular Monoamine Transporter 2 Gene Decreases the Risk of Parkinson's Disease in Han Chinese Men
Source: Parkinsons Dis. 2015 Jul 12;2015:903164. doi: 10.1155/2015/903164 (PMC4515295; doi:10.1155/2015/903164)
Supplement: Supplementary file 1 — Nine SNPs were obtained after imputation: chr10:118987954:D, rs10886050, rs2532798, rs2532799, rs2619102, rs2619103, rs2803820, rs3026047, and rs4081624. After checking HWE and performing logistic regression, none of the nine SNPs was found to differ clearly between the case and control groups. [file 903164.f1.zip]

Archive with 2 entries (2 files):
- Supplementary Table 1.xlsx
- Supplementary Table 2.xlsx
