# Supplementary material for: Polymorphism in the Vesicular Monoamine Transporter 2 Gene Decreases the Risk of Parkinson's Disease in Han Chinese Men
Source: Parkinsons Dis. 2015 Jul 12;2015:903164. doi: 10.1155/2015/903164 (PMC4515295; doi:10.1155/2015/903164)
Supplement: Supplementary file 1 — Nine SNPs were obtained after imputation: chr10:118987954:D, rs10886050, rs2532798, rs2532799, rs2619102, rs2619103, rs2803820, rs3026047, and rs4081624. After checking HWE and performing logistic regression, none of the nine SNPs was found to differ clearly between the case and control groups. [file 903164.f1.zip › Supplementary Table 1.xlsx]

## Sheet: 原始数据
Table S1. SNPs attained by IMPUTE2.
sample	group	sex	chr10:118987954:D	rs10886050	rs2532798	rs2532799	rs2619102	rs2619103	rs2803820	rs3026047	rs4081624
A852B	control	0	1/1	1/2	1/1	1/1	1/1	1/1	1/1	1/2
1481	case	0	1/1	1/2	1/1	1/1	1/1	1/1	1/1	1/2
s0048	control	1	1/1	1/2	1/1	1/1	1/1	1/1	1/1	1/2
8061-1B	control	0	1/2	1/2	1/2	1/2	1/2	1/2	1/2	1/2	1/2
1128B	control	0	1/1		1/1	1/1	1/1	1/1	1/1	2/2	2/2
1488	case	1	1/2	1/2	1/2	1/2	1/2	1/2	1/2	1/2	1/2
1387	case	1	1/1	1/2	1/1	1/1	1/1	1/1	1/1	1/2
1139B	control	1	1/1		1/1	1/1	1/1	1/1	1/1	2/2	2/2
x843	control	1	1/1	1/2	1/1	1/1	1/1	1/1	1/1	1/2
s0013	control	1	1/2	1/1	1/2	1/2	1/2	1/2	1/2	1/1
8295B	control	1	2/2	1/1	2/2	2/2	2/2	2/2	2/2	1/1
8041-1B	control	0	1/1		1/1	1/1	1/1	1/1	1/1	2/2	2/2
1408	case	0	1/1	1/2	1/1	1/1	1/1	1/1	1/1	1/2
x662	control	1	1/2	1/2	1/2	1/2	1/2	1/2	1/2	1/2	1/2
8117-1B	control	0	2/2	1/1	2/2	2/2	2/2	2/2	2/2	1/1
1736B	case	0	1/1	1/2	1/1	1/1	1/1	1/1	1/1	1/2
3051	case	0	1/2	1/2	1/2	1/2	1/2	1/2	1/2	1/2	1/2
x640	control	0	1/2	1/2	1/2	1/2	1/2	1/2	1/2	1/2	1/2
8348B	control	0	1/1		1/1	1/1	1/1	1/1	1/1	2/2	2/2
1597	case	0	1/2	1/2	1/2	1/2	1/2	1/2	1/2	1/2	1/2
695	control	1	1/2	1/2	1/2	1/2	1/2	1/2	1/2	1/2	1/2
8113-1B	control	0	1/2	1/2	1/2	1/2	1/2	1/2	1/2	1/2	1/2
8373B	control	0	1/1		1/1	1/1	1/1	1/1	1/1	2/2	2/2
1638	case	0	1/1		1/1	1/1	1/1	1/1	1/1	2/2	2/2
1760B	case	1	1/1	1/2	1/1	1/1	1/1	1/1	1/1	1/2
1337B	case	0	1/1		1/1	1/1	1/1	1/1	1/1	2/2	2/2
8453B	control	0	1/1	1/2	1/1	1/1	1/1	1/1	1/1	1/2
A891	control	0	1/2	1/2	1/2	1/2	1/2	1/2	1/2	1/2	1/2
3065	case	0	1/2	1/2	1/2	1/2	1/2	1/2	1/2	1/2	1/2
101	control	1	1/1		1/1	1/1	1/1	1/1	1/1	2/2	2/2
1546	case	1	1/1		1/1	1/1	1/1	1/1	1/1	2/2	2/2
8025-1B	control	0	1/2	1/2	1/2	1/2	1/2	1/2	1/2	1/2	1/2
x779	control	0	1/2	1/1	1/2	1/2	1/2	1/2	1/2	1/1
1708B	case	1	1/2	1/2	1/2	1/2	1/2	1/2	1/2	1/2	1/2
3042	case	1	1/2	1/2	1/2	1/2	1/2	1/2	1/2	1/2	1/2
s0037	control	0	1/1	1/2	1/1	1/1	1/1	1/1	1/1	1/2
8304B	control	0	1/1	1/2	1/1	1/1	1/1	1/1	1/1	1/2
1660	case	1	1/1		1/1	1/1	1/1	1/1	1/1	2/2	2/2
1249B	control	0	1/2	1/2	1/2	1/2	1/2	1/2	1/2	1/2	1/2
8369B	control	0	1/2	1/2	1/2	1/2	1/2	1/2	1/2	1/2	1/2
758	control	1	1/2	1/2	1/2	1/2	1/2	1/2	1/2	1/2	1/2
8447B	control	0	1/1	1/2	1/1	1/1	1/1	1/1	1/1	1/2
1336B	case	1	1/1		1/1	1/1	1/1	1/1	1/1	2/2	2/2
1377B	case	1	1/2	1/2	1/2	1/2	1/2	1/2	1/2	1/2	1/2
8448B	control	1	1/1		1/1	1/1	1/1	1/1	1/1	2/2	2/2
8067-1B	control	1	1/2	1/1	1/2	1/2	1/2	1/2	1/2	1/1
1881B	case	1	1/1		1/1	1/1	1/1	1/1	1/1	2/2	2/2
1810B	case	0	2/2	1/1	2/2	2/2	2/2	2/2	2/2	1/1	1/1
8371B	control	1	1/2	1/1	1/2	1/2	1/2	1/2	1/2	1/1
1341B	case	1	1/2	1/2	1/2	1/2	1/2	1/2	1/2	1/2	1/2
96	control	0	1/1		1/1	1/1	1/1	1/1	1/1	2/2	2/2
1667	case	1	1/2	1/2	1/2	1/2	1/2	1/2	1/2	1/2	1/2
1722B	case	1	1/1		1/1	1/1	1/1	1/1	1/1	2/2	2/2
8188-1B	control	1	1/1	1/1	1/1	1/1	1/1	1/1	1/1	1/1
8324B	control	1	1/1		1/1	1/1	1/1	1/1	1/1	2/2	2/2
A838	control	0	1/1		1/1	1/1	1/1	1/1	1/1	2/2	2/2
98	control	0	1/1	1/2	1/1	1/1	1/1	1/1	1/1	1/2
8303B	control	0	1/1		1/1	1/1	1/1	1/1	1/1	2/2	2/2
686	control	1	1/1	1/2	1/1	1/1	1/1	1/1	1/1	1/2
1396	case	1	1/1		1/1	1/1	1/1	1/1	1/1	2/2	2/2
8364B	control	1	1/1	1/2	1/1	1/1	1/1	1/1	1/1	1/2
8289B	control	1	1/1		1/1	1/1	1/1	1/1	1/1	2/2	2/2
1555	case	1	1/2	1/2	1/2	1/2	1/2	1/2	1/2	1/2	1/2
8066-1B	control	0	1/1	1/2	1/1	1/1	1/1	1/1	1/1	1/2
1316B	case	1	1/2	1/1	1/2	1/2	1/2	1/2	1/2	1/1
8096-1B	control	0	1/1	1/2	1/1	1/1	1/1	1/1	1/1	1/2
1585	case	1	1/1	1/2	1/1	1/1	1/1	1/1	1/1	1/2
1373B	case	1	1/2	1/2	1/2	1/2	1/2	1/2	1/2	1/2	1/2
8069-1B	control	0	1/2	1/2	1/2	1/2	1/2	1/2	1/2	1/2	1/2
1821B	case	0	1/1		1/1	1/1	1/1	1/1	1/1	2/2	2/2
8074-1B	control	0	1/2	1/2	1/2	1/2	1/2	1/2	1/2	1/2	1/2
A851B	control	1	1/2	1/1	1/2	1/2	1/2	1/2	1/2	1/1
8082-1B	control	1	1/2	1/2	1/2	1/2	1/2	1/2	1/2	1/2	1/2
1653	case	1	1/1	1/2	1/1	1/1	1/1	1/1	1/1	1/2
8287B	control	0	1/1	1/2	1/1	1/1	1/1	1/1	1/1	1/2
x805	control	1	1/2	1/1	1/2	1/2	1/2	1/2	1/2	1/1
189	control	1	1/2	1/2	1/2	1/2	1/2	1/2	1/2	1/2	1/2
1235B	case	1	1/2	1/2	1/2	1/2	1/2	1/2	1/2	1/2	1/2
8126-1B	control	0	1/1		1/1	1/1	1/1	1/1	1/1	2/2	2/2
1232B	control	1	1/2	1/1	1/2	1/2	1/2	1/2	1/2	1/1
1127B	control	0	1/2	1/2	1/2	1/2	1/2	1/2	1/2	1/2	1/2
1458	case	1	1/1	1/2	1/1	1/1	1/1	1/1	1/1	1/2
x781	control	1	1/1	1/2	1/1	1/1	1/1	1/1	1/1	1/2
8104-1B	control	1	1/1	1/2	1/1	1/1	1/1	1/1	1/1	1/2
x0206	control	1	1/1	1/2	1/1	1/1	1/1	1/1	1/1	1/2
1782B	case	0	1/1		1/1	1/1	1/1	1/1	1/1	2/2	2/2
s0030	control	1	1/2	1/2	1/2	1/2	1/2	1/2	1/2	1/2	1/2
x731	control	1	1/2	1/2	1/2	1/2	1/2	1/2	1/2	1/2	1/2
1424	case	1	2/2	1/1	2/2	2/2	2/2	2/2	2/2	1/1	1/2
8455B	control	1	1/2	1/2	1/2	1/2	1/2	1/2	1/2	1/2	1/2
3036	case	0	1/1	1/2	1/1	1/1	1/1	1/1	1/1	1/2
1721B	case	0	1/1	1/2	1/1	1/1	1/1	1/1	1/1	1/2
1554	case	1	1/2	1/2	1/2	1/2	1/2	1/2	1/2	1/2	1/2
8139-1B	control	0	1/1	1/2	1/1	1/1	1/1	1/1	1/1	1/2
1530	case	0	1/1		1/1	1/1	1/1	1/1	1/1	2/2	2/2
762	control	1	1/1	1/2	1/1	1/1	1/1	1/1	1/1	1/2
1281B	case	1	1/1	1/2	1/1	1/1	1/1	1/1	1/1	1/2
734	control	0	1/2	1/2	1/2	1/2	1/2	1/2	1/2	1/2	1/2
1725B	case	0	1/1	1/1	1/1	1/1	1/1	1/1	1/1	1/1
8306B	control	0	1/2	1/2	1/2	1/2	1/2	1/2	1/2	1/2	1/2
1580	case	1	1/1		1/1	1/1	1/1	1/1	1/1	2/2	2/2
x723	control	1	1/1		1/1	1/1	1/1	1/1	1/1	2/2	2/2
1440	case	1	1/1	1/1	1/1	1/1	1/1	1/1	1/1	1/1
8075-1B	control	0	1/1	1/2	1/1	1/1	1/1	1/1	1/1	1/2
8379B	control	1	1/1		1/1	1/1	1/1	1/1	1/1	2/2	2/2
1895B	case	1	1/2	1/2	1/2	1/2	1/2	1/2	1/2	1/2	1/2
x696	control	1	1/1	1/2	1/1	1/1	1/1	1/1	1/1	1/2
613B	control	0	1/2	1/1	1/2	1/2	1/2	1/2	1/2	1/1
1471	case	1	1/1		1/1	1/1	1/1	1/1	1/1	2/2	2/2
8450B	control	1	1/2	1/2	1/2	1/2	1/2	1/2	1/2	1/2	1/2
8202-1B	control	1	1/1	1/1	1/1	1/1	1/1	1/1	1/1	1/1
1517	case	1	1/2	1/2	1/2	1/2	1/2	1/2	1/2	1/2	1/2
3025	case	1	1/2	1/2	1/2	1/2	1/2	1/2	1/2	1/2	1/2
3004	case	0	1/1	1/1	1/1	1/1	1/1	1/1	1/1	1/1
1794B	case	1	1/1	1/2	1/1	1/1	1/1	1/1	1/1	1/2
x678	control	0	1/2	1/2	1/2	1/2	1/2	1/2	1/2	1/2	1/2
8452B	control	1	2/2	1/1	2/2	2/2	2/2	2/2	2/2	1/1	1/1
1766B	case	1	1/1		1/1	1/1	1/1	1/1	1/1	2/2	2/2
3027	case	1	1/1		1/1	1/1	1/1	1/1	1/1	2/2	2/2
1363B	case	0	1/2	1/1	1/2	1/2	1/2	1/2	1/2	1/1
x737	control	1	1/2	1/2	1/2	1/2	1/2	1/2	1/2	1/2	1/2
1823B	case	1	1/1		1/1	1/1	1/1	1/1	1/1	2/2	2/2
1356B	case	1	1/1	1/2	1/1	1/1	1/1	1/1	1/1	1/2
1276B	case	0	1/1	1/2	1/1	1/1	1/1	1/1	1/1	1/2
1622	case	0	1/1	1/1	1/1	1/1	1/1	1/1	1/1	1/1
3063	case	1	1/1		1/1	1/1	1/1	1/1	1/1	2/2	2/2
8119-1B	control	0	1/1		1/1	1/1	1/1	1/1	1/1	2/2	2/2
s0002	control	0	1/1	1/1	1/1	1/1	1/1	1/1	1/1	1/1
1033	control	1	1/1	1/2	1/1	1/1	1/1	1/1	1/1	1/2
1591	case	1	1/2	1/1	1/2	1/2	1/2	1/2	1/2	1/1
8175-1B	control	1	1/1	1/2	1/1	1/1	1/1	1/1	1/1	1/2
1757B	case	1	1/2	1/2	1/2	1/2	1/2	1/2	1/2	1/2	1/2
1819B	case	0	1/1		1/1	1/1	1/1	1/1	1/1	2/2	2/2
1872B	case	1	1/2	1/2	1/2	1/2	1/2	1/2	1/2	1/2	1/2
1199B	case	1	1/1	1/2	1/1	1/1	1/1	1/1	1/1	1/2
x804	control	1	1/1	1/2	1/1	1/1	1/1	1/1	1/1	1/2
8346B	control	0	1/1		1/1	1/1	1/1	1/1	1/1	2/2	2/2
A1151B	control	1	1/1	1/2	1/1	1/1	1/1	1/1	1/1	1/2
8076-1B	control	0	1/2	1/1	1/2	1/2	1/2	1/2	1/2	1/1
3002	case	1	1/2	1/2	1/2	1/2	1/2	1/2	1/2	1/2	1/2
1541	case	0	1/1		1/1	1/1	1/1	1/1	1/1	2/2	2/2
1390	case	0	1/2	1/2	1/2	1/2	1/2	1/2	1/2	1/2	1/2
1027B	control	1	1/1	1/2	1/1	1/1	1/1	1/1	1/1	1/2
8349B	control	0	1/1		1/1	1/1	1/1	1/1	1/1	2/2	2/2
1499	case	1	1/1		1/1	1/1	1/1	1/1	1/1	2/2	2/2
3010	case	0	1/2	1/2	1/2	1/2	1/2	1/2	1/2	1/2	1/2
919	control	1	1/1		1/1	1/1	1/1	1/1	1/1	2/2	2/2
1268	control	0	1/2	1/2	1/2	1/2	1/2	1/2	1/2	1/2	1/2
3044	case	1	1/2	1/2	1/2	1/2	1/2	1/2	1/2	1/2	1/2
x733	control	1	1/1	1/2	1/1	1/1	1/1	1/1	1/1	1/2
8138-1B	control	1	1/2	1/1	1/2	1/2	1/2	1/2	1/2	1/1
1275B	case	1	1/2	1/2	1/2	1/2	1/2	1/2	1/2	1/2	1/2
0120B	control	1	1/1	1/1	1/1	1/1	1/1	1/1	1/1	1/1
1669	case	1	1/1		1/1	1/1	1/1	1/1	1/1	2/2	2/2
1627	case	1	1/1		1/1	1/1	1/1	1/1	1/1	2/2	2/2
1255B	case	1	1/1	1/2	1/1	1/1	1/1	1/1	1/1	1/2
700	control	1	1/1	1/2	1/1	1/1	1/1	1/1	1/1	1/2
3030	case	0	1/1		1/1	1/1	1/1	1/1	1/1	2/2	2/2
1262B	case	1	1/1		1/1	1/1	1/1	1/1	1/1	2/2	2/2
8328B	control	1	2/2	1/1	2/2	2/2	2/2	2/2	2/2	1/1
1614	case	1	1/1	1/1	1/1	1/1	1/1	1/1	1/1	1/1
1442	case	0	1/2	1/2	1/2	1/2	1/2	1/2	1/2	1/2	1/2
1742B	case	1	1/2	1/2	1/2	1/2	1/2	1/2	1/2	1/2	1/2
1549	case	0	1/2	1/2	1/2	1/2	1/2	1/2	1/2	1/2	1/2
8174-1B	control	0	1/2	1/2	1/2	1/2	1/2	1/2	1/2	1/2	1/2
138	control	0	1/2	1/2	1/2	1/2	1/2	1/2	1/2	1/2	1/2
1383	case	1	1/2	1/2	1/2	1/2	1/2	1/2	1/2	1/2	1/2
1414	case	1	1/1	1/2	1/1	1/1	1/1	1/1	1/1	1/2
666	control	0	1/2	1/2	1/2	1/2	1/2	1/2	1/2	1/2	1/2
1242B	case	1	1/1	1/2	1/1	1/1	1/1	1/1	1/1	1/2
8100-1B	control	1	1/1		1/1	1/1	1/1	1/1	1/1	2/2	2/2
8127-1B	control	1	1/1		1/1	1/1	1/1	1/1	1/1	2/2	2/2
1228B	case	1	2/2	1/1	2/2	2/2	2/2	2/2	2/2	1/1
1273B	case	0	1/2	1/2	1/2	1/2	1/2	1/2	1/2	1/2	1/2
1800B	case	1	1/1		1/1	1/1	1/1	1/1	1/1	2/2	2/2
8085-1B	control	1	1/1	1/2	1/1	1/1	1/1	1/1	1/1	1/2
x871	control	1	1/1		1/1	1/1	1/1	1/1	1/1	2/2	2/2
1740B	case	1	1/1	1/2	1/1	1/1	1/1	1/1	1/1	1/2
112	control	0	1/1	1/2	1/1	1/1	1/1	1/1	1/1	1/2
1664	case	0	1/1	1/2	1/1	1/1	1/1	1/1	1/1	1/2
191	control	1	2/2	1/1	2/2	2/2	2/2	2/2	2/2	1/1
1197B	case	1	1/1		1/1	1/1	1/1	1/1	1/1	2/2	2/2
x910	control	1	1/2	1/2	1/2	1/2	1/2	1/2	1/2	1/2	1/2
8107-1B	control	0	1/1		1/1	1/1	1/1	1/1	1/1	2/2	2/2
x958	control	0	1/2	1/2	1/2	1/2	1/2	1/2	1/2	1/2	1/2
1582	case	1	1/1	1/2	1/1	1/1	1/1	1/1	1/1	1/2
x834	control	0	1/2	1/2	1/2	1/2	1/2	1/2	1/2	1/2	1/2
1752B	case	1	1/1	1/2	1/1	1/1	1/1	1/1	1/1	1/2
1252B	case	0	1/1		1/1	1/1	1/1	1/1	1/1	2/2	2/2
1599	case	1	1/1		1/1	1/1	1/1	1/1	1/1	2/2	2/2
1734B	case	0	1/1	1/2	1/1	1/1	1/1	1/1	1/1	1/2
3013	case	1	1/1		1/1	1/1	1/1	1/1	1/1	2/2	2/2
8185-1B	control	0	1/1	1/2	1/1	1/1	1/1	1/1	1/1	1/2
8063-1B	control	0	1/1	1/2	1/1	1/1	1/1	1/1	1/1	1/2
x1015	control	0	1/2	1/1	1/2	1/2	1/2	1/2	1/2	1/1
1714B	case	0	1/1	1/2	1/1	1/1	1/1	1/1	1/1	1/2
1320B	case	1	1/1	1/2	1/1	1/1	1/1	1/1	1/1	1/2
8102-1B	control	0	1/2	1/2	1/2	1/2	1/2	1/2	1/2	1/2	1/2
1662	case	0	1/1		1/1	1/1	1/1	1/1	1/1	2/2	2/2
8098-1B	control	1	1/1		1/1	1/1	1/1	1/1	1/1	2/2	2/2
x841	control	1	1/2	1/2	1/2	1/2	1/2	1/2	1/2	1/2	1/2
1587	case	1	1/1		1/1	1/1	1/1	1/1	1/1	2/2	2/2
1198B	control	1	1/1	1/2	1/1	1/1	1/1	1/1	1/1	1/2	2/2
8201-1B	control	1	1/1		1/1	1/1	1/1	1/1	1/1	2/2	2/2
8140-1B	control	1	1/1	1/2	1/1	1/1	1/1	1/1	1/1	1/2
1088B	control	0	1/1		1/1	1/1	1/1	1/1	1/1	2/2	2/2
1814B	case	1	1/2	1/1	1/2	1/2	1/2	1/2	1/2	1/1
976B	control	1	1/2	1/2	1/2	1/2	1/2	1/2	1/2	1/2	1/2
929B	control	1	1/2	1/2	1/2	1/2	1/2	1/2	1/2	1/2	1/2
x917	control	0	1/1		1/1	1/1	1/1	1/1	1/1	2/2	2/2
A861	control	0	1/1	1/1	1/1	1/1	1/1	1/1	1/1	1/1
A884	control	0	1/2	1/2	1/2	1/2	1/2	1/2	1/2	1/2	1/2
8215-1B	control	0	1/1		1/1	1/1	1/1	1/1	1/1	2/2	2/2
1765B	case	1	1/2	1/1	1/2	1/2	1/2	1/2	1/2	1/1
1697B	case	0	1/2	1/1	1/2	1/2	1/2	1/2	1/2	1/1
1738B	case	1	1/2	1/2	1/2	1/2	1/2	1/2	1/2	1/2	1/2
1286B	case	1	1/1	1/1	1/1	1/1	1/1	1/1	1/1	1/1
1744B	case	0	1/1		1/1	1/1	1/1	1/1	1/1	2/2	2/2
s0010	control	1	1/1	1/2	1/1	1/1	1/1	1/1	1/1	1/2
1511	case	1	1/1	1/2	1/1	1/1	1/1	1/1	1/1	1/2
3054	case	0	1/1	1/2	1/1	1/1	1/1	1/1	1/1	1/2
1792B	case	1	1/1		1/1	1/1	1/1	1/1	1/1	2/2	2/2
1447	case	1	1/2	1/2	1/2	1/2	1/2	1/2	1/2	1/2	1/2
8354B	control	1	1/2	1/1	1/2	1/2	1/2	1/2	1/2	1/1
1510	case	0	1/1		1/1	1/1	1/1	1/1	1/1	2/2	2/2
8089-1B	control	0	1/1		1/1	1/1	1/1	1/1	1/1	2/2	2/2
8057-1B	control	0	1/2	1/2	1/2	1/2	1/2	1/2	1/2	1/2	1/2
1347B	case	1	2/2	1/1	2/2	2/2	2/2	2/2	2/2	1/1
1111B	control	0	1/2	1/2	1/2	1/2	1/2	1/2	1/2	1/2	1/2
8378B	control	0	1/2	1/2	1/2	1/2	1/2	1/2	1/2	1/2	1/2
1100B	control	0	1/1		1/1	1/1	1/1	1/1	1/1	2/2	2/2
3020	case	1	1/2	1/1	1/2	1/2	1/2	1/2	1/2	1/1
1331B	case	0	1/1		1/1	1/1	1/1	1/1	1/1	2/2	2/2
1776B	case	1	1/2	1/1	1/2	1/2	1/2	1/2	1/2	1/1
1574	case	0	1/2	1/2	1/2	1/2	1/2	1/2	1/2	1/2	1/2
1579	case	0	1/1		1/1	1/1	1/1	1/1	1/1	2/2	2/2
8095-1B	control	0	1/1		1/1	1/1	1/1	1/1	1/1	2/2	2/2
1508	case	0	1/2	1/1	1/2	1/2	1/2	1/2	1/2	1/1
3034	case	0	1/1		1/1	1/1	1/1	1/1	1/1	2/2	2/2
8106-1B	control	1	1/1	1/2	1/1	1/1	1/1	1/1	1/1	1/2
x828	control	1	1/2	1/2	1/2	1/2	1/2	1/2	1/2	1/2	1/2
8332B	control	1	1/2	1/1	1/2	1/2	1/2	1/2	1/2	1/1
8311B	control	1	1/1	1/2	1/1	1/1	1/1	1/1	1/1	1/2
1485	case	0	1/2	1/2	1/2	1/2	1/2	1/2	1/2	1/2	1/2
8092-1B	control	0	1/1	1/1	1/1	1/1	1/1	1/1	1/1	1/1
930B	control	1	1/1	1/2	1/1	1/1	1/1	1/1	1/1	1/2
1520	case	1	1/2	1/2	1/2	1/2	1/2	1/2	1/2	1/2	1/2
A835	control	1	1/2	1/2	1/2	1/2	1/2	1/2	1/2	1/2	1/2
x708	control	1	1/1	1/1	1/1	1/1	1/1	1/1	1/1	1/1
8355B	control	0	1/1	1/2	1/1	1/1	1/1	1/1	1/1	1/2
8173-1B	control	0	1/1	1/2	1/1	1/1	1/1	1/1	1/1	1/2
8071-1B	control	1	1/1	1/1	1/1	1/1	1/1	1/1	1/1	1/1
1313	case	1	1/1	1/2	1/1	1/1	1/1	1/1	1/1	1/2
8634	control	0	1/1		1/1	1/1	1/1	1/1	1/1	2/2	2/2
8166-1B	control	0	1/1		1/1	1/1	1/1	1/1	1/1	2/2	2/2
1465	case	1	1/1	1/1	1/1	1/1	1/1	1/1	1/1	1/1
8317B	control	0	1/1		1/1	1/1	1/1	1/1	1/1	2/2	2/2
1302	case	0	1/2	1/2	1/2	1/2	1/2	1/2	1/2	1/2	1/2
1788B	case	1	1/2	1/2	1/2	1/2	1/2	1/2	1/2	1/2	1/2
8374B	control	0	1/2	1/2	1/2	1/2	1/2	1/2	1/2	1/2	1/2
1748B	case	1	1/1		1/1	1/1	1/1	1/1	1/1	2/2	2/2
A840	control	1	1/1		1/1	1/1	1/1	1/1	1/1	2/2	2/2
s0045	control	1	1/1		1/1	1/1	1/1	1/1	1/1	2/2	2/2
3029	case	0	1/1		1/1	1/1	1/1	1/1	1/1	2/2	2/2
A847	control	1	1/2	1/1	1/2	1/2	1/2	1/2	1/2	1/1
1426	case	1	1/1		1/1	1/1	1/1	1/1	1/1	2/2	2/2
8377B	control	1	1/2	1/1	1/2	1/2	1/2	1/2	1/2	1/1
8181-1B	control	1	1/1		1/1	1/1	1/1	1/1	1/1	2/2	2/2
85	control	0	1/1	1/2	1/1	1/1	1/1	1/1	1/1	1/2
8442B	control	1	1/2	1/1	1/2	1/2	1/2	1/2	1/2	1/1
1486	case	1	1/1	1/2	1/1	1/1	1/1	1/1	1/1	1/2
1319B	case	1	2/2	1/1	2/2	2/2	2/2	2/2	2/2	1/1
3057	case	1	1/1		1/1	1/1	1/1	1/1	1/1	2/2	2/2
1194B	control	1	1/1	1/2	1/1	1/1	1/1	1/1	1/1	1/2	2/2
1190B	case	1	1/2	1/1	1/2	1/2	1/2	1/2	1/2	1/1
x829	control	1	1/2	1/1	1/2	1/2	1/2	1/2	1/2	1/1
3015	case	1	1/1	1/2	1/1	1/1	1/1	1/1	1/1	1/2
x680	control	1	1/1		1/1	1/1	1/1	1/1	1/1	2/2	2/2
s0017	control	1	1/2	1/2	1/2	1/2	1/2	1/2	1/2	1/2	1/2
1202B	case	1	1/1	1/2	1/1	1/1	1/1	1/1	1/1	1/2
1210B	case	1	1/1	1/2	1/1	1/1	1/1	1/1	1/1	1/2
x729	control	1	1/2	1/1	1/2	1/2	1/2	1/2	1/2	1/1
s0026	control	1	1/2	1/1	1/2	1/2	1/2	1/2	1/2	1/1
817B	control	1	1/1	1/1	1/1	1/1	1/1	1/1	1/1	1/1
1404	case	1	1/1		1/1	1/1	1/1	1/1	1/1	2/2	2/2
1036B	control	1	1/2	1/2	1/2	1/2	1/2	1/2	1/2	1/2	1/2
8169-1B	control	0	1/2	1/2	1/2	1/2	1/2	1/2	1/2	1/2	1/2
1543	case	1	1/1	1/1	1/1	1/1	1/1	1/1	1/1	1/1
1287B	case	1	1/2	1/1	1/2	1/2	1/2	1/2	1/2	1/1
1775B	case	0	1/1		1/1	1/1	1/1	1/1	1/1	2/2	2/2
8028-1B	control	0	1/1	1/2	1/1	1/1	1/1	1/1	1/1	1/2
1786B	case	1	1/1		1/1	1/1	1/1	1/1	1/1	2/2	2/2
1625	case	1	1/1	1/2	1/1	1/1	1/1	1/1	1/1	1/2
1402	case	1	1/2	1/1	1/2	1/2	1/2	1/2	1/2	1/1
8363B	control	1	1/2	1/2	1/2	1/2	1/2	1/2	1/2	1/2	1/2
1769B	case	0	1/1	1/2	1/1	1/1	1/1	1/1	1/1	1/2
89	control	0	1/1	1/1	1/1	1/1	1/1	1/1	1/1	1/1
8345B	control	1	1/1		1/1	1/1	1/1	1/1	1/1	2/2	2/2
8081-1B	control	0	1/1		1/1	1/1	1/1	1/1	1/1	2/2	2/2
x802	control	1	1/1	1/2	1/1	1/1	1/1	1/1	1/1	1/2
1146B	control	1	1/2	1/2	1/2	1/2	1/2	1/2	1/2	1/2	1/2
1550	case	1	1/1		1/1	1/1	1/1	1/1	1/1	2/2	2/2
1421	case	1	1/2	1/2	1/2	1/2	1/2	1/2	1/2	1/2	1/2
8212-1B	control	1	1/2	1/1	1/2	1/2	1/2	1/2	1/2	1/1
1267B	case	1	1/2	1/2	1/2	1/2	1/2	1/2	1/2	1/2	1/2
3021	case	1	1/1		1/1	1/1	1/1	1/1	1/1	2/2	2/2
1476	case	1	1/2	1/2	1/2	1/2	1/2	1/2	1/2	1/2	1/2
8196-1B	control	1	1/2	1/1	1/2	1/2	1/2	1/2	1/2	1/1
1353B	case	1	1/1		1/1	1/1	1/1	1/1	1/1	2/2	2/2
3007	case	0	1/2	1/2	1/2	1/2	1/2	1/2	1/2	1/2	1/2
8122-1B	control	0	1/2	1/1	1/2	1/2	1/2	1/2	1/2	1/1
1584	case	1	1/1	1/2	1/1	1/1	1/1	1/1	1/1	1/2
968B	control	1	1/1		1/1	1/1	1/1	1/1	1/1	2/2	2/2
689	control	1	1/2	1/2	1/2	1/2	1/2	1/2	1/2	1/2	1/2
642	control	1	1/2	1/2	1/2	1/2	1/2	1/2	1/2	1/2	1/2
1735B	case	0	1/1	1/2	1/1	1/1	1/1	1/1	1/1	1/2
x619	control	1	1/2	1/2	1/2	1/2	1/2	1/2	1/2	1/2	1/2
198	control	1	1/1	1/2	1/1	1/1	1/1	1/1	1/1	1/2
1831B	case	1	1/2	1/2	1/2	1/2	1/2	1/2	1/2	1/2	1/2
8358B	control	1	1/1		1/1	1/1	1/1	1/1	1/1	2/2	2/2
3003	case	0	1/2	1/2	1/2	1/2	1/2	1/2	1/2	1/2	1/2
1109B	control	0	1/1		1/1	1/1	1/1	1/1	1/1	2/2	2/2
202	control	1	1/2	1/2	1/2	1/2	1/2	1/2	1/2	1/2	1/2
8048-1B	control	1	1/2	1/1	1/2	1/2	1/2	1/2	1/2	1/1
1836B	case	0	1/1		1/1	1/1	1/1	1/1	1/1	2/2	2/2
1459	case	0	1/1		1/1	1/1	1/1	1/1	1/1	2/2	2/2
1479	case	0	1/1	1/1	1/1	1/1	1/1	1/1	1/1	1/1
1671	case	1	1/1	1/2	1/1	1/1	1/1	1/1	1/1	1/2
8189-1B	control	1	1/1		1/1	1/1	1/1	1/1	1/1	2/2	2/2
154	case	1	1/1		1/1	1/1	1/1	1/1	1/1	2/2	2/2
x620	control	1	1/2	1/2	1/2	1/2	1/2	1/2	1/2	1/2	1/2
1361B	case	1	1/1	1/2	1/1	1/1	1/1	1/1	1/1	1/2
998B	control	0	1/1	1/2	1/1	1/1	1/1	1/1	1/1	1/2
3061	case	1	1/1	1/1	1/1	1/1	1/1	1/1	1/1	1/1
1462	case	1	1/1		1/1	1/1	1/1	1/1	1/1	2/2	2/2
x617	control	0	1/2	1/2	1/2	1/2	1/2	1/2	1/2	1/2	1/2
1294B	case	1	1/2	1/2	1/2	1/2	1/2	1/2	1/2	1/2	1/2
1795B	case	1	1/2	1/2	1/2	1/2	1/2	1/2	1/2	1/2	1/2
1222B	case	1	1/1	1/2	1/1	1/1	1/1	1/1	1/1	1/2
3062	case	0	1/2	1/2	1/2	1/2	1/2	1/2	1/2	1/2	1/2
1634	case	1	1/1	1/1	1/1	1/1	1/1	1/1	1/1	1/1
s0025	control	1	1/2	1/2	1/2	1/2	1/2	1/2	1/2	1/2	1/2
1231B	control	1	1/2	1/1	1/2	1/2	1/2	1/2	1/2	1/1
3052	case	0	1/1		1/1	1/1	1/1	1/1	1/1	2/2	2/2
1433	case	0	1/2	1/1	1/2	1/2	1/2	1/2	1/2	1/1
1666	case	0	1/2	1/2	1/2	1/2	1/2	1/2	1/2	1/2	1/2
1322B	case	0	1/1		1/1	1/1	1/1	1/1	1/1	2/2	2/2
1763B	case	0	1/1	1/2	1/1	1/1	1/1	1/1	1/1	1/2
1759B	case	1	1/1	1/2	1/1	1/1	1/1	1/1	1/1	1/2
x713	control	0	1/2	1/2	1/2	1/2	1/2	1/2	1/2	1/2	1/2
A857	control	0	1/1		1/1	1/1	1/1	1/1	1/1	2/2	2/2
1311	case	1	1/1		1/1	1/1	1/1	1/1	1/1	2/2	2/2
1315B	case	1	1/2	1/2	1/2	1/2	1/2	1/2	1/2	1/2	1/2
x177	control	0	1/1		1/1	1/1	1/1	1/1	1/1	2/2	2/2
8451B	control	1	1/2	1/1	1/2	1/2	1/2	1/2	1/2	1/1
612	control	0	1/1		1/1	1/1	1/1	1/1	1/1	2/2	2/2
8333B	control	0	1/1		1/1	1/1	1/1	1/1	1/1	2/2	2/2
1195B	case	0	1/1		1/1	1/1	1/1	1/1	1/1	2/2	2/2
1360B	case	1	1/1	1/2	1/1	1/1	1/1	1/1	1/1	1/2
3070	case	1	1/1		1/1	1/1	1/1	1/1	1/1	2/2	2/2
1650	case	1	1/2	1/2	1/2	1/2	1/2	1/2	1/2	1/2	1/2
8446B	control	1	1/2	1/2	1/2	1/2	1/2	1/2	1/2	1/2	1/2
1753B	case	0	1/2	1/2	1/2	1/2	1/2	1/2	1/2	1/2	1/2
8022-1B	control	1	1/1	1/2	1/1	1/1	1/1	1/1	1/1	1/2
8131-1B	control	0	1/1		1/1	1/1	1/1	1/1	1/1	2/2	2/2
1355B	case	1	1/1		1/1	1/1	1/1	1/1	1/1	2/2	2/2
8351B	control	0	1/1	1/2	1/1	1/1	1/1	1/1	1/1	1/2
8136-1B	control	1	1/1		1/1	1/1	1/1	1/1	1/1	2/2	2/2
8310B	control	1	1/1		1/1	1/1	1/1	1/1	1/1	2/2	2/2
768	control	0	1/1		1/1	1/1	1/1	1/1	1/1	2/2	2/2
8111-1B	control	1	1/1		1/1	1/1	1/1	1/1	1/1	2/2	2/2
A845	control	1	1/2	1/2	1/2	1/2	1/2	1/2	1/2	1/2	1/2
s0009	control	1	1/1		1/1	1/1	1/1	1/1	1/1	2/2	2/2
1483	case	1	1/2	1/2	1/2	1/2	1/2	1/2	1/2	1/2	1/2
8208-1B	control	0	1/2	1/2	1/2	1/2	1/2	1/2	1/2	1/2	1/2
981B	control	1	1/2	1/2	1/2	1/2	1/2	1/2	1/2	1/2	1/2
s0007	control	0	1/1	1/2	1/1	1/1	1/1	1/1	1/1	1/2
1723B	case	0	1/1	1/2	1/1	1/1	1/1	1/1	1/1	1/2
s0043	control	0	1/1		1/1	1/1	1/1	1/1	1/1	2/2	2/2
1504	case	0	1/1		1/1	1/1	1/1	1/1	1/1	2/2	2/2
8024-1B	control	1	1/1		1/1	1/1	1/1	1/1	1/1	2/2	2/2
1081B	control	1	1/2	1/2	1/2	1/2	1/2	1/2	1/2	1/2	1/2
8036-1B	control	0	1/1	1/2	1/1	1/1	1/1	1/1	1/1	1/2
1415	case	0	1/2	1/2	1/2	1/2	1/2	1/2	1/2	1/2	1/2
8296B	control	0	2/2	1/1	2/2	2/2	2/2	2/2	2/2	1/1
x1010	control	1	1/2	1/1	1/2	1/2	1/2	1/2	1/2	1/1
x911	control	0	1/2	1/2	1/2	1/2	1/2	1/2	1/2	1/2	1/2
8199-1B	control	0	1/1		1/1	1/1	1/1	1/1	1/1	2/2	2/2
1866B	case	1	1/1	1/1	1/1	1/1	1/1	1/1	1/1	1/1
1698B	case	0	1/1	1/2	1/1	1/1	1/1	1/1	1/1	1/2
1223B	case	1	1/1		1/1	1/1	1/1	1/1	1/1	2/2	2/2
x741	control	0	1/1	1/1	1/1	1/1	1/1	1/1	1/1	1/1
1644	case	0	1/1	1/1	1/1	1/1	1/1	1/1	1/1	1/1
1526	case	1	1/1		1/1	1/1	1/1	1/1	1/1	2/2	2/2
8368B	control	1	1/1	1/2	1/1	1/1	1/1	1/1	1/1	1/2
8195-1B	control	1	1/1	1/2	1/1	1/1	1/1	1/1	1/1	1/2
1003B	control	1	1/2	1/1	1/2	1/2	1/2	1/2	1/2	1/1
8124-1B	control	1	1/2	1/2	1/2	1/2	1/2	1/2	1/2	1/2	1/2
672B	control	0	1/1		1/1	1/1	1/1	1/1	1/1	2/2	2/2
1372B	case	1	1/1		1/1	1/1	1/1	1/1	1/1	2/2	2/2
3059	case	0	1/1	1/2	1/1	1/1	1/1	1/1	1/1	1/2
1418	case	1	1/2	1/2	1/2	1/2	1/2	1/2	1/2	1/2	1/2
s0014	control	0	1/2	1/2	1/2	1/2	1/2	1/2	1/2	1/2	1/2
x732	control	0	1/1		1/1	1/1	1/1	1/1	1/1	2/2	2/2
1230B	case	0	1/1		1/1	1/1	1/1	1/1	1/1	2/2	2/2
1642	case	0	1/1		1/1	1/1	1/1	1/1	1/1	2/2	2/2
1191B	case	1	1/2	1/2	1/2	1/2	1/2	1/2	1/2	1/2	1/2
x0137	control	0	1/2	1/2	1/2	1/2	1/2	1/2	1/2	1/2	1/2
x867	control	0	1/2	1/2	1/2	1/2	1/2	1/2	1/2	1/2	1/2
1428	case	1	1/2	1/2	1/2	1/2	1/2	1/2	1/2	1/2	1/2
x625	control	0	1/2	1/2	1/2	1/2	1/2	1/2	1/2	1/2	1/2
1474	case	0	1/1		1/1	1/1	1/1	1/1	1/1	2/2	2/2
8040-1B	control	1	1/1		1/1	1/1	1/1	1/1	1/1	2/2	2/2
x815	control	0	1/1		1/1	1/1	1/1	1/1	1/1	2/2	2/2
1423	case	0	1/1	1/2	1/1	1/1	1/1	1/1	1/1	1/2
1365B	case	1	1/1	1/2	1/1	1/1	1/1	1/1	1/1	1/2
1705B	case	1	1/2	1/1	1/2	1/2	1/2	1/2	1/2	1/1
1443	case	1	1/1	1/2	1/1	1/1	1/1	1/1	1/1	1/2
x614	control	1	1/1		1/1	1/1	1/1	1/1	1/1	2/2	2/2
3032	case	1	1/1		1/1	1/1	1/1	1/1	1/1	2/2	2/2
1343B	case	0	1/1	1/2	1/1	1/1	1/1	1/1	1/1	1/2
x835	control	0	1/1		1/1	1/1	1/1	1/1	1/1	2/2	2/2
3023	case	1	1/1		1/1	1/1	1/1	1/1	1/1	2/2	2/2
1234B	case	0	1/2	1/2	1/2	1/2	1/2	1/2	1/2	1/2	1/2
8042-1B	control	0	1/2	1/2	1/2	1/2	1/2	1/2	1/2	1/2	1/2
A1153B	control	0	1/1	1/2	1/1	1/1	1/1	1/1	1/1	1/2
1220B	case	0	1/2	1/2	1/2	1/2	1/2	1/2	1/2	1/2	1/2
1352B	case	0	1/1		1/1	1/1	1/1	1/1	1/1	2/2	2/2
1278B	case	0	1/1	1/2	1/1	1/1	1/1	1/1	1/1	1/2
1657	case	1	1/2	1/2	1/2	1/2	1/2	1/2	1/2	1/2	1/2
1245B	case	1	1/1	1/2	1/1	1/1	1/1	1/1	1/1	1/2
s0031	control	1	1/1	1/2	1/1	1/1	1/1	1/1	1/1	1/2
1852B	case	1	1/1		1/1	1/1	1/1	1/1	1/1	2/2	2/2
8079-1B	control	1	1/1	1/2	1/1	1/1	1/1	1/1	1/1	1/2
8062-1B	control	0	1/2	1/1	1/2	1/2	1/2	1/2	1/2	1/1
1837B	case	1	1/1		1/1	1/1	1/1	1/1	1/1	2/2	2/2
x1009	control	0	1/1		1/1	1/1	1/1	1/1	1/1	2/2	2/2
3039	case	1	1/1	1/1	1/1	1/1	1/1	1/1	1/1	1/1
8294B	control	1	1/1		1/1	1/1	1/1	1/1	1/1	2/2	2/2
1218B	case	0	1/1		1/1	1/1	1/1	1/1	1/1	2/2	2/2
1174B	case	0	1/1	1/1	1/1	1/1	1/1	1/1	1/1	1/1
1155B	control	1	1/1	1/2	1/1	1/1	1/1	1/1	1/1	1/2
3048	case	1	1/2	1/1	1/2	1/2	1/2	1/2	1/2	1/1
1493	case	1	1/2	1/2	1/2	1/2	1/2	1/2	1/2	1/2	1/2
8167-1B	control	1	2/2	1/1	2/2	2/2	2/2	2/2	2/2	1/1
1551	case	1	2/2	1/1	2/2	2/2	2/2	2/2	2/2	1/1
1668	case	1	1/1		1/1	1/1	1/1	1/1	1/1	2/2	2/2
8058-1B	control	1	1/1		1/1	1/1	1/1	1/1	1/1	2/2	2/2
1285B	case	1	1/1		1/1	1/1	1/1	1/1	1/1	2/2	2/2
1830B	case	0	1/2	1/2	1/2	1/2	1/2	1/2	1/2	1/2	1/2
8078-1B	control	1	1/1		1/1	1/1	1/1	1/1	1/1	2/2	2/2
8342B	control	1	1/2	1/2	1/2	1/2	1/2	1/2	1/2	1/2	1/2
8118-1B	control	1	1/2	1/2	1/2	1/2	1/2	1/2	1/2	1/2	1/2
8323B	control	1	1/1	1/2	1/1	1/1	1/1	1/1	1/1	1/2
1133	control	0	1/1	1/2	1/1	1/1	1/1	1/1	1/1	1/2
8325B	control	1	1/2	1/2	1/2	1/2	1/2	1/2	1/2	1/2	1/2
8090-1B	control	0	1/1	1/2	1/1	1/1	1/1	1/1	1/1	1/2
1575	case	0	1/1	1/2	1/1	1/1	1/1	1/1	1/1	1/2
1783B	case	0	1/1	1/2	1/1	1/1	1/1	1/1	1/1	1/2
x831	control	0	1/2	1/2	1/2	1/2	1/2	1/2	1/2	1/2	1/2
1701B	case	0	1/1	1/2	1/1	1/1	1/1	1/1	1/1	1/2
8339B	control	1	2/2	1/1	2/2	2/2	2/2	2/2	2/2	1/1	1/1
1673	case	1	1/2	1/1	1/2	1/2	1/2	1/2	1/2	1/1
1301	case	0	1/1	1/2	1/1	1/1	1/1	1/1	1/1	1/2
439B	control	1	1/1		1/1	1/1	1/1	1/1	1/1	2/2	2/2
x819	control	1	1/1	1/2	1/1	1/1	1/1	1/1	1/1	1/2
8191-1B	control	0	1/1		1/1	1/1	1/1	1/1	1/1	2/2	2/2
1489	case	1	1/2	1/2	1/2	1/2	1/2	1/2	1/2	1/2	1/2
3050	case	1	1/1	1/1	1/1	1/1	1/1	1/1	1/1	1/1
1596	case	1	1/1		1/1	1/1	1/1	1/1	1/1	2/2	2/2
1477	case	1	1/2	1/2	1/2	1/2	1/2	1/2	1/2	1/2	1/2
8301B	control	0	1/2	1/2	1/2	1/2	1/2	1/2	1/2	1/2	1/2
1885B	case	1	1/2	1/2	1/2	1/2	1/2	1/2	1/2	1/2	1/2
x735	control	1	1/2	1/1	1/2	1/2	1/2	1/2	1/2	1/1
s0012	control	0	1/2	1/2	1/2	1/2	1/2	1/2	1/2	1/2	1/2
1743B	case	1	1/1		1/1	1/1	1/1	1/1	1/1	2/2	2/2
1296B	case	1	1/1		1/1	1/1	1/1	1/1	1/1	2/2	2/2
948B	control	0	1/2	1/2	1/2	1/2	1/2	1/2	1/2	1/2	1/2
1758B	case	1	1/1		1/1	1/1	1/1	1/1	1/1	2/2	2/2
8027-1B	control	0	1/1		1/1	1/1	1/1	1/1	1/1	2/2	2/2
8123-1B	control	0	1/1		1/1	1/1	1/1	1/1	1/1	2/2	2/2
8043-1B	control	1	1/1	1/2	1/1	1/1	1/1	1/1	1/1	1/2
1368B	case	0	1/1	1/2	1/1	1/1	1/1	1/1	1/1	1/2
8200-1B	control	0	1/1		1/1	1/1	1/1	1/1	1/1	2/2	2/2
1640	case	0	1/1		1/1	1/1	1/1	1/1	1/1	2/2	2/2
3067	case	1	1/2	1/2	1/2	1/2	1/2	1/2	1/2	1/2	1/2
763	control	1	1/1	1/2	1/1	1/1	1/1	1/1	1/1	1/2
8019-1B	control	0	1/1		1/1	1/1	1/1	1/1	1/1	2/2	2/2
1264B	case	0	1/1	1/2	1/1	1/1	1/1	1/1	1/1	1/2
8319B	control	1	1/1	1/2	1/1	1/1	1/1	1/1	1/1	1/2
8320B	control	0	1/2	1/2	1/2	1/2	1/2	1/2	1/2	1/2	1/2
8128-1B	control	0	1/2	1/2	1/2	1/2	1/2	1/2	1/2	1/2	1/2
927B	control	0	1/1	1/2	1/1	1/1	1/1	1/1	1/1	1/2
1271B	control	1	1/1	1/2	1/1	1/1	1/1	1/1	1/1	1/2	2/2
8213-1B	control	0	1/1		1/1	1/1	1/1	1/1	1/1	2/2	2/2
8172-1B	control	1	1/2	1/2	1/2	1/2	1/2	1/2	1/2	1/2	1/2
1713B	case	1	1/2	1/2	1/2	1/2	1/2	1/2	1/2	1/2	1/2
8382B	control	1	1/2	1/2	1/2	1/2	1/2	1/2	1/2	1/2	1/2
A864	control	0	1/1	1/2	1/1	1/1	1/1	1/1	1/1	1/2
8179-1B	control	1	1/1	1/2	1/1	1/1	1/1	1/1	1/1	1/2
1514	case	1	1/2	1/2	1/2	1/2	1/2	1/2	1/2	1/2	1/2
8209-1B	control	1	1/2	1/1	1/2	1/2	1/2	1/2	1/2	1/1
1012B	control	0	1/1	1/2	1/1	1/1	1/1	1/1	1/1	1/2
6057_1B	case	1	1/1		1/1	1/1	1/1	1/1	1/1	2/2	2/2
x776	control	0	1/2	1/1	1/2	1/2	1/2	1/2	1/2	1/1
1647	case	1	1/2	1/2	1/2	1/2	1/2	1/2	1/2	1/2	1/2
1515	case	0	1/1	1/2	1/1	1/1	1/1	1/1	1/1	1/2
1411	case	0	1/1	1/2	1/1	1/1	1/1	1/1	1/1	1/2
x826	control	0	1/1		1/1	1/1	1/1	1/1	1/1	2/2	2/2
1764B	case	1	1/2	1/2	1/2	1/2	1/2	1/2	1/2	1/2	1/2
1674	case	1	1/1	1/1	1/1	1/1	1/1	1/1	1/1	1/1
x916	control	1	1/1	1/2	1/1	1/1	1/1	1/1	1/1	1/2
1212B	case	0	1/2	1/2	1/2	1/2	1/2	1/2	1/2	1/2	1/2
1659	case	1	1/2	1/1	1/2	1/2	1/2	1/2	1/2	1/1
3037	case	0	1/2	1/2	1/2	1/2	1/2	1/2	1/2	1/2	1/2
8216-1B	control	0	1/1		1/1	1/1	1/1	1/1	1/1	2/2	2/2
1142B	control	1	1/2	1/1	1/2	1/2	1/2	1/2	1/2	1/1
8070-1B	control	0	1/1	1/2	1/1	1/1	1/1	1/1	1/1	1/2
1211B	case	1	1/1		1/1	1/1	1/1	1/1	1/1	2/2	2/2
8207-1B	control	0	1/2	1/2	1/2	1/2	1/2	1/2	1/2	1/2	1/2
1706B	case	1	1/1		1/1	1/1	1/1	1/1	1/1	2/2	2/2
8017-1B	control	0	1/1	1/2	1/1	1/1	1/1	1/1	1/1	1/2
1192B	control	0	1/2	1/2	1/2	1/2	1/2	1/2	1/2	1/2	1/2
1704B	case	0	1/2	1/2	1/2	1/2	1/2	1/2	1/2	1/2	1/2
1312	case	1	1/1		1/1	1/1	1/1	1/1	1/1	2/2	2/2
1225B	case	0	1/1		1/1	1/1	1/1	1/1	1/1	2/2	2/2
8029-1B	control	1	2/2	1/1	2/2	2/2	2/2	2/2	2/2	1/1
8444B	control	1	1/1	1/2	1/1	1/1	1/1	1/1	1/1	1/2
1815B	case	1	1/1	1/2	1/1	1/1	1/1	1/1	1/1	1/2
8068-1B	control	0	1/1		1/1	1/1	1/1	1/1	1/1	2/2	2/2
8211-1B	control	1	1/1	1/1	1/1	1/1	1/1	1/1	1/1	1/1
8305B	control	0	1/1		1/1	1/1	1/1	1/1	1/1	2/2	2/2
1553	case	1	1/1	1/1	1/1	1/1	1/1	1/1	1/1	1/1
8097-1B	control	1	1/2	1/2	1/2	1/2	1/2	1/2	1/2	1/2	1/2
1749B	case	0	1/2	1/2	1/2	1/2	1/2	1/2	1/2	1/2	1/2
8316B	control	1	1/2	1/2	1/2	1/2	1/2	1/2	1/2	1/2	1/2
1303	case	0	1/1		1/1	1/1	1/1	1/1	1/1	2/2	2/2
1233B	case	1	1/1	1/2	1/1	1/1	1/1	1/1	1/1	1/2
1654	case	0	1/1	1/2	1/1	1/1	1/1	1/1	1/1	1/2
1173B	case	1	1/2	1/2	1/2	1/2	1/2	1/2	1/2	1/2	1/2
x918	control	1	1/2	1/2	1/2	1/2	1/2	1/2	1/2	1/2	1/2
1398	case	1	2/2	1/1	2/2	2/2	2/2	2/2	2/2	1/1	1/1
999B	control	1	1/1	1/2	1/1	1/1	1/1	1/1	1/1	1/2
1430	case	1	2/2	1/1	2/2	2/2	2/2	2/2	2/2	1/1
1189B	case	0	1/1	1/2	1/1	1/1	1/1	1/1	1/1	1/2
3016	case	1	1/1		1/1	1/1	1/1	1/1	1/1	2/2	2/2
1283B	case	0	1/2	1/1	1/2	1/2	1/2	1/2	1/2	1/1
1506	case	1	1/1	1/2	1/1	1/1	1/1	1/1	1/1	1/2
8322B	control	0	1/1	1/1	1/1	1/1	1/1	1/1	1/1	1/1
1573	case	0	1/1	1/2	1/1	1/1	1/1	1/1	1/1	1/2
1472	case	1	1/1	1/2	1/1	1/1	1/1	1/1	1/1	1/2
8292B	control	1	1/2	1/1	1/2	1/2	1/2	1/2	1/2	1/1
8110-1B	control	1	1/2	1/2	1/2	1/2	1/2	1/2	1/2	1/2	1/2
3008	case	0	1/2	1/2	1/2	1/2	1/2	1/2	1/2	1/2	1/2
1246	control	0	1/1	1/2	1/1	1/1	1/1	1/1	1/1	1/2
435B	control	1	1/1	1/2	1/1	1/1	1/1	1/1	1/1	1/2
1083	control	0	1/2	1/2	1/2	1/2	1/2	1/2	1/2	1/2	1/2
128B	control	0	1/2	1/1	1/2	1/2	1/2	1/2	1/2	1/1
3024	case	1	1/1	1/2	1/1	1/1	1/1	1/1	1/1	1/2
8286B	control	1	1/2	1/1	1/2	1/2	1/2	1/2	1/2	1/1
8130-1B	control	0	1/2	1/1	1/2	1/2	1/2	1/2	1/2	1/1
8108-1B	control	1	1/2	1/2	1/2	1/2	1/2	1/2	1/2	1/2	1/2
8361B	control	1	1/1	1/2	1/1	1/1	1/1	1/1	1/1	1/2
8084-1B	control	1	1/2	1/2	1/2	1/2	1/2	1/2	1/2	1/2	1/2
1518	case	1	1/1	1/2	1/1	1/1	1/1	1/1	1/1	1/2
1745B	case	1	1/1		1/1	1/1	1/1	1/1	1/1	2/2	2/2
1773B	case	1	1/1	1/2	1/1	1/1	1/1	1/1	1/1	1/2
178	control	0	1/1		1/1	1/1	1/1	1/1	1/1	2/2	2/2
8299B	control	1	1/1		1/1	1/1	1/1	1/1	1/1	2/2	2/2
8445B	control	0	1/1		1/1	1/1	1/1	1/1	1/1	2/2	2/2
x860	control	1	1/2	1/2	1/2	1/2	1/2	1/2	1/2	1/2	1/2
1429	case	1	1/1	1/2	1/1	1/1	1/1	1/1	1/1	1/2
1835B	case	1	1/2	1/2	1/2	1/2	1/2	1/2	1/2	1/2	1/2
8190-1B	control	0	1/2	1/2	1/2	1/2	1/2	1/2	1/2	1/2	1/2
8120-1B	control	1	1/2	1/2	1/2	1/2	1/2	1/2	1/2	1/2	1/2
x808	control	1	1/2	1/2	1/2	1/2	1/2	1/2	1/2	1/2	1/2
x720	control	0	1/1		1/1	1/1	1/1	1/1	1/1	2/2	2/2
x736	control	1	1/2	1/2	1/2	1/2	1/2	1/2	1/2	1/2	1/2
s0005	control	0	1/2	1/2	1/2	1/2	1/2	1/2	1/2	1/2	1/2
3026	case	0	1/1	1/1	1/1	1/1	1/1	1/1	1/1	1/1
8336B	control	1	1/2	1/2	1/2	1/2	1/2	1/2	1/2	1/2	1/2
x722	control	0	1/1		1/1	1/1	1/1	1/1	1/1	2/2	2/2
3069	case	0	1/1		1/1	1/1	1/1	1/1	1/1	2/2	2/2
8091-1B	control	0	1/2	1/2	1/2	1/2	1/2	1/2	1/2	1/2	1/2
1445	case	0	1/2	1/1	1/2	1/2	1/2	1/2	1/2	1/1
3064	case	0	1/1	1/2	1/1	1/1	1/1	1/1	1/1	1/2
8206-1B	control	0	1/1	1/1	1/1	1/1	1/1	1/1	1/1	1/1
8290B	control	0	1/1	1/2	1/1	1/1	1/1	1/1	1/1	1/2
951B	control	0	1/1	1/1	1/1	1/1	1/1	1/1	1/1	1/1
x691	control	1	1/1		1/1	1/1	1/1	1/1	1/1	2/2	2/2
A865	control	1	1/1		1/1	1/1	1/1	1/1	1/1	2/2	2/2
8381B	control	1	1/2	1/1	1/2	1/2	1/2	1/2	1/2	1/1
1152B	control	1	1/2	1/2	1/2	1/2	1/2	1/2	1/2	1/2	1/2
1645	case	0	1/1		1/1	1/1	1/1	1/1	1/1	2/2	2/2
1888B	case	0	1/2	1/1	1/2	1/2	1/2	1/2	1/2	1/1
1460	case	0	1/1	1/2	1/1	1/1	1/1	1/1	1/1	1/2
1389	case	1	1/1	1/1	1/1	1/1	1/1	1/1	1/1	1/1
1755	case	1	1/2	1/1	1/2	1/2	1/2	1/2	1/2	1/1
8203-1B	control	1	1/1	1/1	1/1	1/1	1/1	1/1	1/1	1/1
8307B	control	0	1/1		1/1	1/1	1/1	1/1	1/1	2/2	2/2
8192-1B	control	0	1/1		1/1	1/1	1/1	1/1	1/1	2/2	2/2
8340B	control	1	1/1	1/1	1/1	1/1	1/1	1/1	1/1	1/1
1498	case	1	1/1	1/2	1/1	1/1	1/1	1/1	1/1	1/2
3045	case	1	1/1	1/2	1/1	1/1	1/1	1/1	1/1	1/2
1386	case	1	1/1	1/2	1/1	1/1	1/1	1/1	1/1	1/2
1639	case	0	1/1		1/1	1/1	1/1	1/1	1/1	2/2	2/2
1536	case	0	1/1		1/1	1/1	1/1	1/1	1/1	2/2	2/2
1419	case	0	1/2	1/1	1/2	1/2	1/2	1/2	1/2	1/1
1381B	case	1	1/1		1/1	1/1	1/1	1/1	1/1	2/2	2/2
8347B	control	1	1/1	1/2	1/1	1/1	1/1	1/1	1/1	1/2
1618	case	0	1/2	1/2	1/2	1/2	1/2	1/2	1/2	1/2	1/2
947B	control	1	1/1	1/2	1/1	1/1	1/1	1/1	1/1	1/2
8088-1B	control	0	1/1	1/2	1/1	1/1	1/1	1/1	1/1	1/2
64	control	1	1/2	1/1	1/2	1/2	1/2	1/2	1/2	1/1
983B	control	0	2/2	1/1	2/2	2/2	2/2	2/2	2/2	1/1
1473	case	0	1/2	1/2	1/2	1/2	1/2	1/2	1/2	1/2	1/2
1820B	case	1	2/2	1/1	2/2	2/2	2/2	2/2	2/2	1/1
1200B	case	1	1/2	1/2	1/2	1/2	1/2	1/2	1/2	1/2	1/2
8093-1B	control	0	1/2	1/1	1/2	1/2	1/2	1/2	1/2	1/1
1628	case	0	1/1	1/2	1/1	1/1	1/1	1/1	1/1	1/2
8143-1B	control	1	1/2	1/1	1/2	1/2	1/2	1/2	1/2	1/1
x677	control	1	1/2	1/2	1/2	1/2	1/2	1/2	1/2	1/2	1/2
8023-1B	control	1	1/2	1/1	1/2	1/2	1/2	1/2	1/2	1/1
1834B	case	1	1/2	1/2	1/2	1/2	1/2	1/2	1/2	1/2	1/2
1002B	control	0	1/1		1/1	1/1	1/1	1/1	1/1	2/2	2/2
1817B	case	0	1/1		1/1	1/1	1/1	1/1	1/1	2/2	2/2
8031-1B	control	0	1/2	1/1	1/2	1/2	1/2	1/2	1/2	1/1
A853	control	1	1/2	1/2	1/2	1/2	1/2	1/2	1/2	1/2	1/2
1333B	case	0	1/1	1/2	1/1	1/1	1/1	1/1	1/1	1/2
1272B	control	0	1/1	1/2	1/1	1/1	1/1	1/1	1/1	1/2	1/2
1779B	case	1	1/2	1/2	1/2	1/2	1/2	1/2	1/2	1/2	1/2
1179B	control	1	1/1		1/1	1/1	1/1	1/1	1/1	2/2	2/2
8308B	control	1	1/1		1/1	1/1	1/1	1/1	1/1	2/2	2/2
A837	control	1	1/1	1/2	1/1	1/1	1/1	1/1	1/1	1/2
1246B	case	1	1/2	1/2	1/2	1/2	1/2	1/2	1/2	1/2	1/2
8214-1B	control	1	1/1		1/1	1/1	1/1	1/1	1/1	2/2	2/2
1359B	case	1	1/1		1/1	1/1	1/1	1/1	1/1	2/2	2/2
1251B	control	1	1/1	1/2	1/1	1/1	1/1	1/1	1/1	2/2	2/2
8376B	control	1	1/1		1/1	1/1	1/1	1/1	1/1	2/2	2/2
x833	control	0	1/2	1/1	1/2	1/2	1/2	1/2	1/2	1/1
8291B	control	0	1/1	1/2	1/1	1/1	1/1	1/1	1/1	1/2
x870	control	1	1/2	1/1	1/2	1/2	1/2	1/2	1/2	1/1
8170-1B	control	1	1/1	1/1	1/1	1/1	1/1	1/1	1/1	1/1
1085B	control	0	1/2	1/1	1/2	1/2	1/2	1/2	1/2	1/1
694	control	1	1/2	1/2	1/2	1/2	1/2	1/2	1/2	1/2	1/2
1171B	case	0	1/1		1/1	1/1	1/1	1/1	1/1	2/2	2/2
1376B	case	1	1/1	1/2	1/1	1/1	1/1	1/1	1/1	1/2
3031	case	0	1/1	1/2	1/1	1/1	1/1	1/1	1/1	1/2
1450	case	1	1/1		1/1	1/1	1/1	1/1	1/1	2/2	2/2
x624	control	0	1/1	1/2	1/1	1/1	1/1	1/1	1/1	1/2
1259B	control	0	1/2	1/2	1/2	1/2	1/2	1/2	1/2	1/2	1/2
3011	case	1	1/1		1/1	1/1	1/1	1/1	1/1	2/2	2/2
1075B	control	0	1/2	1/2	1/2	1/2	1/2	1/2	1/2	1/2	1/2
x674	control	0	1/1	1/2	1/1	1/1	1/1	1/1	1/1	1/2
1366B	case	0	1/2	1/1	1/2	1/2	1/2	1/2	1/2	1/1
x806	control	0	1/1		1/1	1/1	1/1	1/1	1/1	2/2	2/2
x684	control	0	2/2	1/1	2/2	2/2	2/2	2/2	2/2	1/1	1/1
1457	case	0	1/1	1/2	1/1	1/1	1/1	1/1	1/1	1/2
1818B	case	1	1/2	1/1	1/2	1/2	1/2	1/2	1/2	1/1
1741B	case	1	1/1		1/1	1/1	1/1	1/1	1/1	2/2	2/2
8353B	control	0	2/2	1/1	2/2	2/2	2/2	2/2	2/2	1/1
8060-1B	control	0	1/1		1/1	1/1	1/1	1/1	1/1	2/2	2/2
1621	case	1	1/2	1/1	1/2	1/2	1/2	1/2	1/2	1/1
8080-1B	control	0	1/2	1/2	1/2	1/2	1/2	1/2	1/2	1/2	1/2
8370B	control	1	1/1	1/2	1/1	1/1	1/1	1/1	1/1	1/2
1247B	control	0	1/1	1/2	1/1	1/1	1/1	1/1	1/1	2/2	2/2
8457B	control	0	1/2	1/2	1/2	1/2	1/2	1/2	1/2	1/2	1/2
1581	case	0	1/1		1/1	1/1	1/1	1/1	1/1	2/2	2/2
3035	case	1	1/2	1/2	1/2	1/2	1/2	1/2	1/2	1/2	1/2
1367B	case	0	1/1	1/1	1/1	1/1	1/1	1/1	1/1	1/1
1203B	case	0	1/1	1/2	1/1	1/1	1/1	1/1	1/1	1/2
1180B	case	0	1/2	1/2	1/2	1/2	1/2	1/2	1/2	1/2	1/2
8121-1B	control	0	1/2	1/1	1/2	1/2	1/2	1/2	1/2	1/1
s0018	control	1	1/1		1/1	1/1	1/1	1/1	1/1	2/2	2/2
751	control	1	1/2	1/2	1/2	1/2	1/2	1/2	1/2	1/2	1/2
1500	case	0	1/1	1/1	1/1	1/1	1/1	1/1	1/1	1/1
8210-1B	control	0	1/1		1/1	1/1	1/1	1/1	1/1	2/2	2/2
1400	case	1	1/1	1/2	1/1	1/1	1/1	1/1	1/1	1/2
1733B	case	1	1/1		1/1	1/1	1/1	1/1	1/1	2/2	2/2
1824B	case	1	1/2	1/2	1/2	1/2	1/2	1/2	1/2	1/2	1/2
x727	control	0	1/1	1/2	1/1	1/1	1/1	1/1	1/1	1/2
8087-1B	control	0	1/2	1/2	1/2	1/2	1/2	1/2	1/2	1/2	1/2
8293B	control	1	1/1	1/1	1/1	1/1	1/1	1/1	1/1	1/1
1388	case	0	1/1	1/2	1/1	1/1	1/1	1/1	1/1	1/2
3028	case	1	1/1	1/2	1/1	1/1	1/1	1/1	1/1	1/2
8037-1B	control	1	1/1		1/1	1/1	1/1	1/1	1/1	2/2	2/2
8026-1B	control	1	2/2	1/1	2/2	2/2	2/2	2/2	2/2	1/1	1/1
8134-1B	control	1	1/2	1/2	1/2	1/2	1/2	1/2	1/2	1/2	1/2
1277B	case	0	1/1		1/1	1/1	1/1	1/1	1/1	2/2	2/2
8112-1B	control	1	1/2	1/2	1/2	1/2	1/2	1/2	1/2	1/2	1/2
1470	case	1	1/1		1/1	1/1	1/1	1/1	1/1	2/2	2/2
8309B	control	0	1/1		1/1	1/1	1/1	1/1	1/1	2/2	2/2
8633	control	0	1/2	1/2	1/2	1/2	1/2	1/2	1/2	1/2	1/2
0161_2	control	0	1/2	1/2	1/2	1/2	1/2	1/2	1/2	1/2	1/2
1420	case	0	1/1	1/2	1/1	1/1	1/1	1/1	1/1	1/2
1258B	control	0	1/1		1/1	1/1	1/1	1/1	1/1	2/2	2/2
1594	case	0	1/1	1/2	1/1	1/1	1/1	1/1	1/1	1/2
1379B	case	1	1/2	1/2	1/2	1/2	1/2	1/2	1/2	1/2	1/2
1789B	case	1	1/2	1/1	1/2	1/2	1/2	1/2	1/2	1/1
1533	case	0	1/1		1/1	1/1	1/1	1/1	1/1	2/2	2/2
3005	case	1	1/1		1/1	1/1	1/1	1/1	1/1	2/2	2/2
1435	case	1	1/1		1/1	1/1	1/1	1/1	1/1	2/2	2/2
1548	case	1	1/1		1/1	1/1	1/1	1/1	1/1	2/2	2/2
1257B	control	0	1/2	1/1	1/2	1/2	1/2	1/2	1/2	1/1
0222B	control	0	1/1	1/2	1/1	1/1	1/1	1/1	1/1	1/2
x707	control	0	1/1		1/1	1/1	1/1	1/1	1/1	2/2	2/2
8178-1B	control	1	1/1	1/2	1/1	1/1	1/1	1/1	1/1	1/2
x665	control	0	1/1	1/2	1/1	1/1	1/1	1/1	1/1	1/2
1487	case	1	1/1		1/1	1/1	1/1	1/1	1/1	2/2	2/2
1661	case	1	1/2	1/2	1/2	1/2	1/2	1/2	1/2	1/2	1/2
3041	case	0	1/1		1/1	1/1	1/1	1/1	1/1	2/2	2/2
1606	case	1	1/2	1/2	1/2	1/2	1/2	1/2	1/2	1/2	1/2
x864	control	0	1/1		1/1	1/1	1/1	1/1	1/1	2/2	2/2
1496	case	1	1/1	1/2	1/1	1/1	1/1	1/1	1/1	1/2
1592	case	1	1/1	1/2	1/1	1/1	1/1	1/1	1/1	1/2
8065-1B	control	1	1/1	1/2	1/1	1/1	1/1	1/1	1/1	1/2
s0047	control	0	1/1		1/1	1/1	1/1	1/1	1/1	2/2	2/2
988B	control	1	1/1		1/1	1/1	1/1	1/1	1/1	2/2	2/2
8165-1B	control	1	1/1		1/1	1/1	1/1	1/1	1/1	2/2	2/2
1284B	case	1	1/1	1/2	1/1	1/1	1/1	1/1	1/1	1/2
1159B	control	1	1/1	1/2	1/1	1/1	1/1	1/1	1/1	1/2
1413	case	1	1/1		1/1	1/1	1/1	1/1	1/1	2/2	2/2
8204-1B	control	1	1/2	1/2	1/2	1/2	1/2	1/2	1/2	1/2	1/2
1374B	case	1	1/1		1/1	1/1	1/1	1/1	1/1	2/2	2/2
1598	case	0	2/2	1/1	2/2	2/2	2/2	2/2	2/2	1/1
8168-1B	control	1	1/1	1/2	1/1	1/1	1/1	1/1	1/1	1/2
1491	case	0	1/2	1/1	1/2	1/2	1/2	1/2	1/2	1/1
x615	control	1	1/2	1/1	1/2	1/2	1/2	1/2	1/2	1/1
x739	control	1	1/1		1/1	1/1	1/1	1/1	1/1	2/2	2/2
1241B	case	0	1/1		1/1	1/1	1/1	1/1	1/1	2/2	2/2
1732B	case	1	1/1	1/2	1/1	1/1	1/1	1/1	1/1	1/2
s0008	control	0	1/1		1/1	1/1	1/1	1/1	1/1	2/2	2/2
8033-1B	control	1	1/1		1/1	1/1	1/1	1/1	1/1	2/2	2/2
8326B	control	1	1/1	1/2	1/1	1/1	1/1	1/1	1/1	1/2
1696B	case	1	1/2	1/2	1/2	1/2	1/2	1/2	1/2	1/2	1/2
1871B	case	1	1/1		1/1	1/1	1/1	1/1	1/1	2/2	2/2
1107B	control	0	1/1	1/2	1/1	1/1	1/1	1/1	1/1	1/2
1826B	case	0	1/1		1/1	1/1	1/1	1/1	1/1	2/2	2/2
8047-1B	control	0	1/1		1/1	1/1	1/1	1/1	1/1	2/2	2/2
1409	case	1	1/1	1/2	1/1	1/1	1/1	1/1	1/1	1/2
1626	case	1	1/1		1/1	1/1	1/1	1/1	1/1	2/2	2/2
8297B	control	0	1/1	1/1	1/1	1/1	1/1	1/1	1/1	1/1
797	control	1	1/1		1/1	1/1	1/1	1/1	1/1	2/2	2/2
1215B	case	0	1/2	1/2	1/2	1/2	1/2	1/2	1/2	1/2	1/2
8372B	control	0	1/1		1/1	1/1	1/1	1/1	1/1	2/2	2/2
1299	case	1	1/1	1/2	1/1	1/1	1/1	1/1	1/1	1/2
1663	case	1	1/1		1/1	1/1	1/1	1/1	1/1	2/2	2/2
1611	case	1	1/2	1/2	1/2	1/2	1/2	1/2	1/2	1/2	1/2
s0036	control	1	1/2	1/1	1/2	1/2	1/2	1/2	1/2	1/1
x730	control	1	1/2	1/1	1/2	1/2	1/2	1/2	1/2	1/1
1338B	case	1	1/2	1/2	1/2	1/2	1/2	1/2	1/2	1/2	1/2
3046	case	1	1/1	1/2	1/1	1/1	1/1	1/1	1/1	1/2
8183-1B	control	1	1/1		1/1	1/1	1/1	1/1	1/1	2/2	2/2
1382	case	1	1/1		1/1	1/1	1/1	1/1	1/1	2/2	2/2
1832B	case	1	1/1		1/1	1/1	1/1	1/1	1/1	2/2	2/2
8094-1B	control	0	1/1		1/1	1/1	1/1	1/1	1/1	2/2	2/2
1226B	case	1	1/1	1/2	1/1	1/1	1/1	1/1	1/1	1/2
8182-1B	control	0	2/2	1/1	2/2	2/2	2/2	2/2	2/2	1/1
699	control	1	1/2	1/2	1/2	1/2	1/2	1/2	1/2	1/2	1/2
1750B	case	1	1/1		1/1	1/1	1/1	1/1	1/1	2/2	2/2
1250B	control	0	1/1	1/2	1/1	1/1	1/1	1/1	1/1	2/2	2/2
3018	case	0	1/1	1/2	1/1	1/1	1/1	1/1	1/1	1/2
8059-1B	control	1	1/1		1/1	1/1	1/1	1/1	1/1	2/2	2/2
x203	control	1	1/1	1/2	1/1	1/1	1/1	1/1	1/1	1/2
8197-1B	control	0	1/1	1/2	1/1	1/1	1/1	1/1	1/1	1/2
x711	control	1	1/1		1/1	1/1	1/1	1/1	1/1	2/2	2/2
3012	case	1	1/2	1/2	1/2	1/2	1/2	1/2	1/2	1/2	1/2
s0035	control	1	1/2	1/2	1/2	1/2	1/2	1/2	1/2	1/2	1/2
8300B	control	1	1/2	1/2	1/2	1/2	1/2	1/2	1/2	1/2	1/2
1600	case	0	1/1	1/1	1/1	1/1	1/1	1/1	1/1	1/1
1196B	control	0	1/1	1/2	1/1	1/1	1/1	1/1	1/1	1/2
3056	case	1	1/1	1/2	1/1	1/1	1/1	1/1	1/1	1/2
1434	case	1	1/1	1/2	1/1	1/1	1/1	1/1	1/1	1/2
1547	case	0	1/1		1/1	1/1	1/1	1/1	1/1	2/2	2/2
x0115	control	1	1/1	1/2	1/1	1/1	1/1	1/1	1/1	1/2
436B	control	1	1/1		1/1	1/1	1/1	1/1	1/1	2/2	2/2
1619	case	1	1/1		1/1	1/1	1/1	1/1	1/1	2/2	2/2
1891B	case	0	1/1		1/1	1/1	1/1	1/1	1/1	2/2	2/2
8327B	control	1	1/1	1/2	1/1	1/1	1/1	1/1	1/1	1/2
1490	case	1	2/2	1/1	2/2	2/2	2/2	2/2	2/2	1/1	1/1
x912	control	0	1/2	1/2	1/2	1/2	1/2	1/2	1/2	1/2	1/2
1130B	control	1	1/1		1/1	1/1	1/1	1/1	1/1	2/2	2/2
8055-1B	control	0	1/1	1/1	1/1	1/1	1/1	1/1	1/1	1/1
997B	control	0	1/1		1/1	1/1	1/1	1/1	1/1	2/2	2/2
1263B	case	0	1/1	1/2	1/1	1/1	1/1	1/1	1/1	1/2
8142-1B	control	1	1/1	1/2	1/1	1/1	1/1	1/1	1/1	1/2
x712	control	0	1/1		1/1	1/1	1/1	1/1	1/1	2/2	2/2
1787B	case	1	2/2	1/1	2/2	2/2	2/2	2/2	2/2	1/1	1/1
3055	case	0	1/2	1/2	1/2	1/2	1/2	1/2	1/2	1/2	1/2
1270B	control	1	1/2	1/2	1/2	1/2	1/2	1/2	1/2	1/2	1/2
1079B	control	0	1/1		1/1	1/1	1/1	1/1	1/1	2/2	2/2
8046-1B	control	0	1/1		1/1	1/1	1/1	1/1	1/1	2/2	2/2
1268B	case	1	1/1	1/1	1/1	1/1	1/1	1/1	1/1	1/1
1193B	control	1	1/1	1/2	1/1	1/1	1/1	1/1	1/1	1/2
3040	case	0	1/2	1/2	1/2	1/2	1/2	1/2	1/2	1/2	1/2
1306	case	0	1/1		1/1	1/1	1/1	1/1	1/1	2/2	2/2
8103-1B	control	1	1/2	1/2	1/2	1/2	1/2	1/2	1/2	1/2	1/2
1369B	case	0	1/2	1/1	1/2	1/2	1/2	1/2	1/2	1/1
8116-1B	control	1	1/2	1/2	1/2	1/2	1/2	1/2	1/2	1/2	1/2
1370B	case	1	1/1	1/2	1/1	1/1	1/1	1/1	1/1	1/2
s0001	control	1	2/2	1/1	2/2	2/2	2/2	2/2	2/2	1/1
8073-1B	control	1	1/1		1/1	1/1	1/1	1/1	1/1	2/2	2/2
3066	case	1	1/2	1/2	1/2	1/2	1/2	1/2	1/2	1/2	1/2
x718	control	1	1/2	1/1	1/2	1/2	1/2	1/2	1/2	1/1
795	control	0	1/1		1/1	1/1	1/1	1/1	1/1	2/2	2/2
8021-1B	control	0	1/2	1/2	1/2	1/2	1/2	1/2	1/2	1/2	1/2
1201B	case	0	1/2	1/2	1/2	1/2	1/2	1/2	1/2	1/2	1/2
A868	control	1	1/1		1/1	1/1	1/1	1/1	1/1	2/2	2/2
1392	case	1	2/2	1/1	2/2	2/2	2/2	2/2	2/2	1/1	1/1
1848B	case	0	1/1	1/2	1/1	1/1	1/1	1/1	1/1	1/2
8198-1B	control	0	1/1	1/2	1/1	1/1	1/1	1/1	1/1	1/2
8360B	control	0	1/1	1/2	1/1	1/1	1/1	1/1	1/1	1/2
A899	control	1	1/1	1/2	1/1	1/1	1/1	1/1	1/1	1/2
8083-1B	control	0	1/2	1/2	1/2	1/2	1/2	1/2	1/2	1/2	1/2
1151B	control	1	1/1		1/1	1/1	1/1	1/1	1/1	2/2	2/2
1603	case	1	1/2	1/2	1/2	1/2	1/2	1/2	1/2	1/2	1/2
1380B	case	1	1/1	1/2	1/1	1/1	1/1	1/1	1/1	1/2
1503	case	0	1/1	1/2	1/1	1/1	1/1	1/1	1/1	1/2
77B	control	1	1/1		1/1	1/1	1/1	1/1	1/1	2/2	2/2
1164B	control	0	1/1		1/1	1/1	1/1	1/1	1/1	2/2	2/2
A848	control	0	1/1	1/2	1/1	1/1	1/1	1/1	1/1	1/2
1771B	case	1	1/1		1/1	1/1	1/1	1/1	1/1	2/2	2/2
8129-1B	control	1	1/1	1/2	1/1	1/1	1/1	1/1	1/1	1/2
1513	case	0	1/2	1/1	1/2	1/2	1/2	1/2	1/2	1/1
1264	control	1	1/1		1/1	1/1	1/1	1/1	1/1	2/2	2/2
8343B	control	1	1/1	1/2	1/1	1/1	1/1	1/1	1/1	1/2
1161B	control	0	1/1		1/1	1/1	1/1	1/1	1/1	2/2	2/2
8302B	control	0	1/1	1/2	1/1	1/1	1/1	1/1	1/1	1/2
1633	case	0	1/2	1/1	1/2	1/2	1/2	1/2	1/2	1/1
1116B	control	1	1/1		1/1	1/1	1/1	1/1	1/1	2/2	2/2
1427	case	0	1/2	1/2	1/2	1/2	1/2	1/2	1/2	1/2	1/2
1484	case	0	1/2	1/2	1/2	1/2	1/2	1/2	1/2	1/2	1/2
195	control	0	1/2	1/1	1/2	1/2	1/2	1/2	1/2	1/1
1274B	control	1	1/1	1/2	1/1	1/1	1/1	1/1	1/1	1/2	1/2
8056-1B	control	1	1/2	1/2	1/2	1/2	1/2	1/2	1/2	1/2	1/2
1602	case	0	1/2	1/2	1/2	1/2	1/2	1/2	1/2	1/2	1/2
8171-1B	control	0	1/2	1/2	1/2	1/2	1/2	1/2	1/2	1/2	1/2
8109-1B	control	0	1/1	1/2	1/1	1/1	1/1	1/1	1/1	1/2
x773	control	0	1/2	1/1	1/2	1/2	1/2	1/2	1/2	1/1
8020-1B	control	0	1/1		1/1	1/1	1/1	1/1	1/1	2/2	2/2
1441	case	0	1/2	1/1	1/2	1/2	1/2	1/2	1/2	1/1
8054-1B	control	1	1/1		1/1	1/1	1/1	1/1	1/1	2/2	2/2
1399	case	0	1/1		1/1	1/1	1/1	1/1	1/1	2/2	2/2
8050-1B	control	1	1/2	1/2	1/2	1/2	1/2	1/2	1/2	1/2	1/2
8205-1B	control	1	1/1		1/1	1/1	1/1	1/1	1/1	2/2	2/2
s0021	control	0	1/1		1/1	1/1	1/1	1/1	1/1	2/2	2/2
995B	control	0	1/1	1/1	1/1	1/1	1/1	1/1	1/1	1/1
3022	case	0	1/1		1/1	1/1	1/1	1/1	1/1	2/2	2/2
201	control	1	1/1		1/1	1/1	1/1	1/1	1/1	2/2	2/2
1730B	case	1	1/1	1/2	1/1	1/1	1/1	1/1	1/1	1/2
1401	case	1	1/1		1/1	1/1	1/1	1/1	1/1	2/2	2/2
719	control	0	1/1		1/1	1/1	1/1	1/1	1/1	2/2	2/2
1129B	control	1	1/1	1/1	1/1	1/1	1/1	1/1	1/1	1/1
1282B	case	1	1/2	1/1	1/2	1/2	1/2	1/2	1/2	1/1
1529	case	1	1/2	1/2	1/2	1/2	1/2	1/2	1/2	1/2	1/2
1772B	case	1	1/2	1/2	1/2	1/2	1/2	1/2	1/2	1/2	1/2
8045-1B	control	0	1/2	1/2	1/2	1/2	1/2	1/2	1/2	1/2	1/2
x801	control	0	1/2	1/2	1/2	1/2	1/2	1/2	1/2	1/2	1/2
229B	control	1	1/2	1/1	1/2	1/2	1/2	1/2	1/2	1/1
434B	control	1	1/1		1/1	1/1	1/1	1/1	1/1	2/2	2/2
1747B	case	1	1/1		1/1	1/1	1/1	1/1	1/1	2/2	2/2
8115-1B	control	0	2/2	1/1	2/2	2/2	2/2	2/2	2/2	1/1
965B	control	1	1/1		1/1	1/1	1/1	1/1	1/1	2/2	2/2
8101-1B	control	0	1/1		1/1	1/1	1/1	1/1	1/1	2/2	2/2
8357B	control	0	1/1		1/1	1/1	1/1	1/1	1/1	2/2	2/2
1364B	case	0	1/2	1/2	1/2	1/2	1/2	1/2	1/2	1/2	1/2
1269B	control	1	1/1	1/2	1/1	1/1	1/1	1/1	1/1	2/2	2/2
1552	case	0	1/1		1/1	1/1	1/1	1/1	1/1	2/2	2/2
1731B	case	1	1/1	1/2	1/1	1/1	1/1	1/1	1/1	1/2
1796B	case	1	1/1		1/1	1/1	1/1	1/1	1/1	2/2	2/2
3014	case	0	1/2	1/1	1/2	1/2	1/2	1/2	1/2	1/1
1841B	case	0	1/2	1/1	1/2	1/2	1/2	1/2	1/2	1/1
1451	case	1	1/2	1/2	1/2	1/2	1/2	1/2	1/2	1/2	1/2
1342B	case	0	1/1		1/1	1/1	1/1	1/1	1/1	2/2	2/2
8086-1B	control	0	1/1		1/1	1/1	1/1	1/1	1/1	2/2	2/2
8298B	control	1	1/1	1/2	1/1	1/1	1/1	1/1	1/1	1/2
1329B	case	0	2/2	1/1	2/2	2/2	2/2	2/2	2/2	1/1
A844	control	1	1/2	1/2	1/2	1/2	1/2	1/2	1/2	1/2	1/2
1375B	control	1	1/2	1/2	1/2	1/2	1/2	1/2	1/2	1/2	1/2
8135-1B	control	1	1/1		1/1	1/1	1/1	1/1	1/1	2/2	2/2
1641	case	0	1/1		1/1	1/1	1/1	1/1	1/1	2/2	2/2
8454B	control	1	1/2	1/2	1/2	1/2	1/2	1/2	1/2	1/2	1/2
8044-1B	control	0	1/1		1/1	1/1	1/1	1/1	1/1	2/2	2/2
1265B	control	0	1/2	1/2	1/2	1/2	1/2	1/2	1/2	1/2	1/2
1384	case	0	1/2	1/2	1/2	1/2	1/2	1/2	1/2	1/2	1/2
1715B	case	1	1/1	1/1	1/1	1/1	1/1	1/1	1/1	1/1
1468	case	0	2/2	1/1	2/2	2/2	2/2	2/2	2/2	1/1
8077-1B	control	1	1/1	1/1	1/1	1/1	1/1	1/1	1/1	1/1
1762B	case	1	1/1		1/1	1/1	1/1	1/1	1/1	2/2	2/2
1087B	control	0	1/1		1/1	1/1	1/1	1/1	1/1	2/2	2/2
8072-1B	control	0	1/1	1/1	1/1	1/1	1/1	1/1	1/1	1/1
x853	control	1	1/1	1/2	1/1	1/1	1/1	1/1	1/1	1/2
1318B	case	0	1/1	1/2	1/1	1/1	1/1	1/1	1/1	1/2
1221B	case	0	1/1	1/2	1/1	1/1	1/1	1/1	1/1	1/2
966B	control	0	1/1	1/1	1/1	1/1	1/1	1/1	1/1	1/1
8359B	control	1	1/1	1/2	1/1	1/1	1/1	1/1	1/1	1/2
755	control	1	1/1	1/1	1/1	1/1	1/1	1/1	1/1	1/1
1768B	case	1	1/1	1/2	1/1	1/1	1/1	1/1	1/1	1/2
8052-1B	control	1	1/1	1/2	1/1	1/1	1/1	1/1	1/1	1/2
1117B	control	1	1/2	1/2	1/2	1/2	1/2	1/2	1/2	1/2	1/2
1403	case	1	1/1	1/2	1/1	1/1	1/1	1/1	1/1	1/2
1038B	control	0	1/1	1/2	1/1	1/1	1/1	1/1	1/1	1/2
8049-1B	control	1	1/2	1/2	1/2	1/2	1/2	1/2	1/2	1/2	1/2
8039-1B	control	0	2/2	1/1	2/2	2/2	2/2	2/2	2/2	1/1
3049	case	0	1/1		1/1	1/1	1/1	1/1	1/1	2/2	2/2
s0011	control	1	2/2	1/1	2/2	2/2	2/2	2/2	2/2	1/1	1/1
1497	case	1	1/2	1/2	1/2	1/2	1/2	1/2	1/2	1/2	1/2
1304	case	1	1/1		1/1	1/1	1/1	1/1	1/1	2/2	2/2
3033	case	0	1/1	1/2	1/1	1/1	1/1	1/1	1/1	1/2
8032-1B	control	0	1/2	1/2	1/2	1/2	1/2	1/2	1/2	1/2	1/2
183	control	1	1/1	1/1	1/1	1/1	1/1	1/1	1/1	1/1
s0033	control	1	1/1	1/1	1/1	1/1	1/1	1/1	1/1	1/1
8018-1B	control	0	1/1		1/1	1/1	1/1	1/1	1/1	2/2	2/2
8177-1B	control	1	1/1		1/1	1/1	1/1	1/1	1/1	2/2	2/2
1593	case	1	1/2	1/2	1/2	1/2	1/2	1/2	1/2	1/2	1/2
8176-1B	control	0	1/1	1/2	1/1	1/1	1/1	1/1	1/1	1/2
437B	control	0	1/2	1/2	1/2	1/2	1/2	1/2	1/2	1/2	1/2
8016-1B	control	1	1/1	1/2	1/1	1/1	1/1	1/1	1/1	1/2
3068	case	0	1/1	1/1	1/1	1/1	1/1	1/1	1/1	1/1
3053	case	1	1/2	1/1	1/2	1/2	1/2	1/2	1/2	1/1
1183B	case	0	1/1		1/1	1/1	1/1	1/1	1/1	2/2	2/2
8362B	control	1	2/2	1/1	2/2	2/2	2/2	2/2	2/2	1/1
A906	control	1	1/2	1/2	1/2	1/2	1/2	1/2	1/2	1/2	1/2
1432	case	1	1/1	1/2	1/1	1/1	1/1	1/1	1/1	1/2
785	control	1	1/1		1/1	1/1	1/1	1/1	1/1	2/2	2/2
1213B	case	0	2/2	1/1	2/2	2/2	2/2	2/2	2/2	1/1
8114-1B	control	0	1/1	1/2	1/1	1/1	1/1	1/1	1/1	1/2
1393	case	1	1/1	1/2	1/1	1/1	1/1	1/1	1/1	1/2
1248B	case	0	1/1		1/1	1/1	1/1	1/1	1/1	2/2	2/2
991B	control	1	1/1	1/2	1/1	1/1	1/1	1/1	1/1	1/2
1137B	control	0	1/2	1/2	1/2	1/2	1/2	1/2	1/2	1/2	1/2
8318B	control	1	1/1	1/2	1/1	1/1	1/1	1/1	1/1	1/2
x714	control	1	2/2	1/1	2/2	2/2	2/2	2/2	2/2	1/1	1/1
3001	case	1	1/1		1/1	1/1	1/1	1/1	1/1	2/2	2/2
8366B	control	1	1/2	1/2	1/2	1/2	1/2	1/2	1/2	1/2	1/2
s0039	control	1	1/2	1/2	1/2	1/2	1/2	1/2	1/2	1/2	1/2
8133-1B	control	0	1/1	1/2	1/1	1/1	1/1	1/1	1/1	1/2
s0024	control	1	1/1	1/2	1/1	1/1	1/1	1/1	1/1	1/2
1665	case	1	1/1	1/2	1/1	1/1	1/1	1/1	1/1	1/2
65	control	1	1/2	1/1	1/2	1/2	1/2	1/2	1/2	1/1
8288B	control	1	1/1		1/1	1/1	1/1	1/1	1/1	2/2	2/2
1827B	case	1	1/1		1/1	1/1	1/1	1/1	1/1	2/2	2/2
1115B	control	0	1/1		1/1	1/1	1/1	1/1	1/1	2/2	2/2
1707B	case	0	1/1		1/1	1/1	1/1	1/1	1/1	2/2	2/2
964B	control	1	1/1		1/1	1/1	1/1	1/1	1/1	2/2	2/2
x845	control	0	1/1		1/1	1/1	1/1	1/1	1/1	2/2	2/2
8051-1B	control	1	1/1	1/1	1/1	1/1	1/1	1/1	1/1	1/1
931B	control	1	1/2	1/2	1/2	1/2	1/2	1/2	1/2	1/2	1/2
1652	case	0	1/1		1/1	1/1	1/1	1/1	1/1	2/2	2/2
1482	case	0	1/2	1/2	1/2	1/2	1/2	1/2	1/2	1/2	1/2
1412	case	1	1/2	1/2	1/2	1/2	1/2	1/2	1/2	1/2	1/2
908B	control	1	1/2	1/2	1/2	1/2	1/2	1/2	1/2	1/2	1/2
228	control	0	1/1	1/2	1/1	1/1	1/1	1/1	1/1	1/2
8180-1B	control	0	1/1		1/1	1/1	1/1	1/1	1/1	2/2	2/2
s0015	control	1	1/1	1/1	1/1	1/1	1/1	1/1	1/1	1/1
8186-1B	control	0	1/1	1/2	1/1	1/1	1/1	1/1	1/1	1/2
8137-1B	control	1	1/1	1/2	1/1	1/1	1/1	1/1	1/1	1/2
A886	control	0	1/2	1/2	1/2	1/2	1/2	1/2	1/2	1/2	1/2
1709B	case	1	1/1		1/1	1/1	1/1	1/1	1/1	2/2	2/2
1521	case	0	1/2	1/2	1/2	1/2	1/2	1/2	1/2	1/2	1/2
8338B	control	1	1/2	1/2	1/2	1/2	1/2	1/2	1/2	1/2	1/2
721	control	0	1/1		1/1	1/1	1/1	1/1	1/1	2/2	2/2
1767B	case	1	2/2	1/1	2/2	2/2	2/2	2/2	2/2	1/1
1153B	control	1	1/2	1/2	1/2	1/2	1/2	1/2	1/2	1/2	1/2
x818	control	0	1/2	1/2	1/2	1/2	1/2	1/2	1/2	1/2	1/2
1746B	case	0	1/1		1/1	1/1	1/1	1/1	1/1	2/2	2/2
8035-1B	control	1	1/1	1/2	1/1	1/1	1/1	1/1	1/1	1/2
1505	case	1	1/2	1/1	1/2	1/2	1/2	1/2	1/2	1/1
3058	case	0	1/1	1/2	1/1	1/1	1/1	1/1	1/1	1/2
1175B	case	1	1/2	1/2	1/2	1/2	1/2	1/2	1/2	1/2	1/2
1711B	case	0	1/2	1/1	1/2	1/2	1/2	1/2	1/2	1/1
8141-1B	control	0	1/1		1/1	1/1	1/1	1/1	1/1	2/2	2/2
1177B	case	0	1/1	1/2	1/1	1/1	1/1	1/1	1/1	1/2
1417	case	1	1/1	1/2	1/1	1/1	1/1	1/1	1/1	1/2
8125-1B	control	0	1/1	1/2	1/1	1/1	1/1	1/1	1/1	1/2
x814	control	1	1/2	1/2	1/2	1/2	1/2	1/2	1/2	1/2	1/2
1780B	case	1	1/2	1/1	1/2	1/2	1/2	1/2	1/2	1/1
8312B	control	1	1/2	1/2	1/2	1/2	1/2	1/2	1/2	1/2	1/2
A846	control	1	1/1		1/1	1/1	1/1	1/1	1/1	2/2	2/2
1475	case	0	1/1	1/1	1/1	1/1	1/1	1/1	1/1	1/1
x820	control	0	1/1		1/1	1/1	1/1	1/1	1/1	2/2	2/2
8187-1B	control	0	1/1		1/1	1/1	1/1	1/1	1/1	2/2	2/2
A842	control	1	1/2	1/2	1/2	1/2	1/2	1/2	1/2	1/2	1/2
1214B	control	1	1/2	1/1	1/2	1/2	1/2	1/2	1/2	1/1
8105-1B	control	1	1/1		1/1	1/1	1/1	1/1	1/1	2/2	2/2
3017	case	0	1/2	1/2	1/2	1/2	1/2	1/2	1/2	1/2	1/2
3060	case	0	1/1		1/1	1/1	1/1	1/1	1/1	2/2	2/2
1527	case	0	2/2	1/1	2/2	2/2	2/2	2/2	2/2	1/1
1031B	control	0	1/2	1/2	1/2	1/2	1/2	1/2	1/2	1/2	1/2
1893B	case	0	1/2	1/2	1/2	1/2	1/2	1/2	1/2	1/2	1/2
123	control	1	1/1		1/1	1/1	1/1	1/1	1/1	2/2	2/2
8356B	control	1	1/1	1/2	1/1	1/1	1/1	1/1	1/1	1/2
1583	case	1	1/2	1/2	1/2	1/2	1/2	1/2	1/2	1/2	1/2
1544	case	1	1/2	1/2	1/2	1/2	1/2	1/2	1/2	1/2	1/2
1538	case	1	1/1	1/2	1/1	1/1	1/1	1/1	1/1	1/2
1323B	case	0	1/2	1/1	1/2	1/2	1/2	1/2	1/2	1/1
1781B	case	1	1/2	1/2	1/2	1/2	1/2	1/2	1/2	1/2	1/2
s0041	control	0	1/1		1/1	1/1	1/1	1/1	1/1	2/2	2/2
1422	case	0	1/1	1/2	1/1	1/1	1/1	1/1	1/1	1/2
1261B	case	1	1/1	1/1	1/1	1/1	1/1	1/1	1/1	1/1
3006	case	0	1/1	1/2	1/1	1/1	1/1	1/1	1/1	1/2
8034-1B	control	0	1/1	1/1	1/1	1/1	1/1	1/1	1/1	1/1
1266B	case	1	1/1		1/1	1/1	1/1	1/1	1/1	2/2	2/2
1209B	control	0	1/1	1/2	1/1	1/1	1/1	1/1	1/1	1/2	2/2
x807	control	1	1/1		1/1	1/1	1/1	1/1	1/1	2/2	2/2
A892	control	1	1/2	1/1	1/2	1/2	1/2	1/2	1/2	1/1
8064-1B	control	1	1/1		1/1	1/1	1/1	1/1	1/1	2/2	2/2
1289B	case	1	1/1		1/1	1/1	1/1	1/1	1/1	2/2	2/2
88	control	1	2/2	1/1	2/2	2/2	2/2	2/2	2/2	1/1	1/1
1761B	case	1	1/1	1/2	1/1	1/1	1/1	1/1	1/1	1/2
A882	control	0	1/1		1/1	1/1	1/1	1/1	1/1	2/2	2/2
3043	case	0	1/2	1/2	1/2	1/2	1/2	1/2	1/2	1/2	1/2
3038	case	0	1/2	1/2	1/2	1/2	1/2	1/2	1/2	1/2	1/2
848	control	1	1/1		1/1	1/1	1/1	1/1	1/1	2/2	2/2
8053-1B	control	0	1/1	1/2	1/1	1/1	1/1	1/1	1/1	1/2
1629	case	0	1/2	1/1	1/2	1/2	1/2	1/2	1/2	1/1
s0023	control	1	1/2	1/2	1/2	1/2	1/2	1/2	1/2	1/2	1/2
1455	case	1	1/1	1/1	1/1	1/1	1/1	1/1	1/1	1/1
1405	case	0	1/1	1/2	1/1	1/1	1/1	1/1	1/1	1/2
1017B	control	0	1/2	1/1	1/2	1/2	1/2	1/2	1/2	1/1
1492	case	0	1/1	1/2	1/1	1/1	1/1	1/1	1/1	1/2
1332B	case	1	1/1	1/2	1/1	1/1	1/1	1/1	1/1	1/2
1207B	case	1	1/1	1/2	1/1	1/1	1/1	1/1	1/1	1/2
x618	control	0	1/1		1/1	1/1	1/1	1/1	1/1	2/2	2/2
8099-1B	control	1	1/1		1/1	1/1	1/1	1/1	1/1	2/2	2/2
1362B	case	1	1/2	1/2	1/2	1/2	1/2	1/2	1/2	1/2	1/2
8315B	control	1	1/2	1/2	1/2	1/2	1/2	1/2	1/2	1/2	1/2
1030B	control	1	1/1	1/2	1/1	1/1	1/1	1/1	1/1	1/2
1028B	control	0	1/1		1/1	1/1	1/1	1/1	1/1	2/2	2/2
x726	control	0	1/2	1/2	1/2	1/2	1/2	1/2	1/2	1/2	1/2
1720B	case	0	1/1	1/2	1/1	1/1	1/1	1/1	1/1	1/2
8132-1B	control	1	1/1	1/2	1/1	1/1	1/1	1/1	1/1	1/2
