# Supplementary material for: Polymorphism in the Vesicular Monoamine Transporter 2 Gene Decreases the Risk of Parkinson's Disease in Han Chinese Men
Source: Parkinsons Dis. 2015 Jul 12;2015:903164. doi: 10.1155/2015/903164 (PMC4515295; doi:10.1155/2015/903164)
Supplement: Supplementary file 1 — Nine SNPs were obtained after imputation: chr10:118987954:D, rs10886050, rs2532798, rs2532799, rs2619102, rs2619103, rs2803820, rs3026047, and rs4081624. After checking HWE and performing logistic regression, none of the nine SNPs was found to differ clearly between the case and control groups. [file 903164.f1.zip › Supplementary Table 2.xlsx]

## Sheet: ALL
RS	Model	Genotype	Case	Control	OR(95%CI)	P-value
rs2803820	Codominant	1/1	296	334	-	-
		1/2	157	206	0.860(0.663-1.115)	0.255459
		2/2	18	21	0.967(0.506-1.850)	0.919694
	Dominant	1/1	296	334	0.870(0.676-1.119)	0.277764
		1/2-2/2	175	227
	Recessive	1/1-1/2	453	540	1.022(0.538-1.941)	0.947588
		2/2	18	21
	Heterozygote Advantage	1/1-2/2	314	355	0.862(0.666-1.114)	0.256561
		1/2	157	206
	Additive	-	-	-	0.904(0.727-1.123)	0.36129
	Allele	1	749	874	0.908(0.735-1.122)	0.372681
		2	193	248
RS	Model	Genotype	Case	Control	OR(95%CI)	P-value
chr10:118987954:D	Codominant	1/1	296	334	-	-
		1/2	157	206	0.860(0.663-1.115)	0.255459
		2/2	18	21	0.967(0.506-1.850)	0.919694
	Dominant	1/1	296	334	0.870(0.676-1.119)	0.277764
		1/2-2/2	175	227
	Recessive	1/1-1/2	453	540	1.022(0.538-1.941)	0.947588
		2/2	18	21
	Heterozygote Advantage	1/1-2/2	314	355	0.862(0.666-1.114)	0.256561
		1/2	157	206
	Additive	-	-	-	0.904(0.727-1.123)	0.36129
	Allele	1	749	874	0.908(0.735-1.122)	0.372681
		2	193	248
RS	Model	Genotype	Case	Control	OR(95%CI)	P-value
rs2532799	Codominant	1/1	296	334	-	-
		1/2	157	206	0.860(0.663-1.115)	0.255459
		2/2	18	21	0.967(0.506-1.850)	0.919694
	Dominant	1/1	296	334	0.870(0.676-1.119)	0.277764
		1/2-2/2	175	227
	Recessive	1/1-1/2	453	540	1.022(0.538-1.941)	0.947588
		2/2	18	21
	Heterozygote Advantage	1/1-2/2	314	355	0.862(0.666-1.114)	0.256561
		1/2	157	206
	Additive	-	-	-	0.904(0.727-1.123)	0.36129
	Allele	1	749	874	0.908(0.735-1.122)	0.372681
		2	193	248
RS	Model	Genotype	Case	Control	OR(95%CI)	P-value
rs10886050	Codominant	1/1	87	111	-	-
		1/2	241	284	1.083(0.779-1.504)	0.635994
		2/2	0	0	unKnown(unKnown-unKnown)	1
	Dominant	1/1	87	111	1.083(0.779-1.504)	0.635994
		1/2-2/2	241	284
	Recessive	1/1-1/2	328	395	unKnown(unKnown-unKnown)	1
		2/2	0	0
	Heterozygote Advantage	1/1-2/2	87	111	1.083(0.779-1.504)	0.635994
		1/2	241	284
	Additive	-	-	-	1.083(0.779-1.504)	0.635994
	Allele	1	415	506	1.035(0.834-1.283)	0.756268
		2	241	284
RS	Model	Genotype	Case	Control	OR(95%CI)	P-value
rs2619102	Codominant	1/1	296	334	-	-
		1/2	157	206	0.860(0.663-1.115)	0.255459
		2/2	18	21	0.967(0.506-1.850)	0.919694
	Dominant	1/1	296	334	0.870(0.676-1.119)	0.277764
		1/2-2/2	175	227
	Recessive	1/1-1/2	453	540	1.022(0.538-1.941)	0.947588
		2/2	18	21
	Heterozygote Advantage	1/1-2/2	314	355	0.862(0.666-1.114)	0.256561
		1/2	157	206
	Additive	-	-	-	0.904(0.727-1.123)	0.36129
	Allele	1	749	874	0.908(0.735-1.122)	0.372681
		2	193	248
RS	Model	Genotype	Case	Control	OR(95%CI)	P-value
rs3026047	Codominant	2/2	143	170	-	-
		2/1	241	280	1.023(0.772-1.356)	0.872887
		1/1	87	111	0.932(0.651-1.333)	0.698902
	Dominant	2/2	143	170	0.997(0.764-1.302)	0.983919
		2/1-1/1	328	391
	Recessive	2/2-2/1	384	450	0.918(0.672-1.255)	0.593214
		1/1	87	111
	Heterozygote Advantage	2/2-1/1	230	281	1.052(0.823-1.344)	0.687514
		2/1	241	280
	Additive	-	-	-	0.972(0.815-1.159)	0.751915
	Allele	2	527	620	0.973(0.817-1.158)	0.754611
		1	415	502
RS	Model	Genotype	Case	Control	OR(95%CI)	P-value
rs2532798	Codominant	1/1	296	334	-	-
		1/2	157	206	0.860(0.663-1.115)	0.255459
		2/2	18	21	0.967(0.506-1.850)	0.919694
	Dominant	1/1	296	334	0.870(0.676-1.119)	0.277764
		1/2-2/2	175	227
	Recessive	1/1-1/2	453	540	1.022(0.538-1.941)	0.947588
		2/2	18	21
	Heterozygote Advantage	1/1-2/2	314	355	0.862(0.666-1.114)	0.256561
		1/2	157	206
	Additive	-	-	-	0.904(0.727-1.123)	0.36129
	Allele	1	749	874	0.908(0.735-1.122)	0.372681
		2	193	248
RS	Model	Genotype	Case	Control	OR(95%CI)	P-value
rs2619103	Codominant	1/1	296	334	-	-
		1/2	157	206	0.860(0.663-1.115)	0.255459
		2/2	18	21	0.967(0.506-1.850)	0.919694
	Dominant	1/1	296	334	0.870(0.676-1.119)	0.277764
		1/2-2/2	175	227
	Recessive	1/1-1/2	453	540	1.022(0.538-1.941)	0.947588
		2/2	18	21
	Heterozygote Advantage	1/1-2/2	314	355	0.862(0.666-1.114)	0.256561
		1/2	157	206
	Additive	-	-	-	0.904(0.727-1.123)	0.36129
	Allele	1	749	874	0.908(0.735-1.122)	0.372681
		2	193	248
RS	Model	Genotype	Case	Control	OR(95%CI)	P-value
rs4081624	Codominant	2/2	143	174	-	-
		2/1	118	150	0.957(0.690-1.328)	0.793359
		1/1	5	7	0.869(0.270-2.797)	0.814044
	Dominant	2/2	143	174	0.953(0.690-1.317)	0.771872
		2/1-1/1	123	157
	Recessive	2/2-2/1	261	324	0.887(0.278-2.826)	0.838882
		1/1	5	7
	Heterozygote Advantage	2/2-1/1	148	181	0.962(0.695-1.331)	0.81538
		2/1	118	150
	Additive	-	-	-	0.952(0.705-1.285)	0.74773
	Allele	2	404	498	0.962(0.738-1.255)	0.775652
		1	128	164

## Sheet: sex=0
RS	Model	Genotype	Case	Control	OR(95%CI)	P-value
rs2803820	Codominant	1/1	124	170	-	-
		1/2	62	87	0.977(0.655-1.457)	0.909185
		2/2	6	8	1.028(0.348-3.039)	0.959843
	Dominant	1/1	124	170	0.981(0.666-1.446)	0.924121
		1/2-2/2	68	95
	Recessive	1/1-1/2	186	257	1.036(0.354-3.037)	0.948188
		2/2	6	8
	Heterozygote Advantage	1/1-2/2	130	178	0.976(0.656-1.451)	0.903519
		1/2	62	87
	Additive	-	-	-	0.989(0.704-1.390)	0.949765
	Allele	1	310	427	0.990(0.710-1.380)	0.950881
		2	74	103
RS	Model	Genotype	Case	Control	OR(95%CI)	P-value
chr10:118987954:D	Codominant	1/1	124	170	-	-
		1/2	62	87	0.977(0.655-1.457)	0.909185
		2/2	6	8	1.028(0.348-3.039)	0.959843
	Dominant	1/1	124	170	0.981(0.666-1.446)	0.924121
		1/2-2/2	68	95
	Recessive	1/1-1/2	186	257	1.036(0.354-3.037)	0.948188
		2/2	6	8
	Heterozygote Advantage	1/1-2/2	130	178	0.976(0.656-1.451)	0.903519
		1/2	62	87
	Additive	-	-	-	0.989(0.704-1.390)	0.949765
	Allele	1	310	427	0.990(0.710-1.380)	0.950881
		2	74	103
RS	Model	Genotype	Case	Control	OR(95%CI)	P-value
rs2532799	Codominant	1/1	124	170	-	-
		1/2	62	87	0.977(0.655-1.457)	0.909185
		2/2	6	8	1.028(0.348-3.039)	0.959843
	Dominant	1/1	124	170	0.981(0.666-1.446)	0.924121
		1/2-2/2	68	95
	Recessive	1/1-1/2	186	257	1.036(0.354-3.037)	0.948188
		2/2	6	8
	Heterozygote Advantage	1/1-2/2	130	178	0.976(0.656-1.451)	0.903519
		1/2	62	87
	Additive	-	-	-	0.989(0.704-1.390)	0.949765
	Allele	1	310	427	0.990(0.710-1.380)	0.950881
		2	74	103
RS	Model	Genotype	Case	Control	OR(95%CI)	P-value
rs10886050	Codominant	1/1	37	41	-	-
		1/2	97	132	0.814(0.486-1.364)	0.435169
		2/2	0	0	unKnown(unKnown-unKnown)	1
	Dominant	1/1	37	41	0.814(0.486-1.364)	0.435169
		1/2-2/2	97	132
	Recessive	1/1-1/2	134	173	unKnown(unKnown-unKnown)	1
		2/2	0	0
	Heterozygote Advantage	1/1-2/2	37	41	0.814(0.486-1.364)	0.435169
		1/2	97	132
	Additive	-	-	-	0.814(0.486-1.364)	0.435169
	Allele	1	171	214	0.920(0.661-1.280)	0.619131
		2	97	132
RS	Model	Genotype	Case	Control	OR(95%CI)	P-value
rs2619102	Codominant	1/1	124	170	-	-
		1/2	62	87	0.977(0.655-1.457)	0.909185
		2/2	6	8	1.028(0.348-3.039)	0.959843
	Dominant	1/1	124	170	0.981(0.666-1.446)	0.924121
		1/2-2/2	68	95
	Recessive	1/1-1/2	186	257	1.036(0.354-3.037)	0.948188
		2/2	6	8
	Heterozygote Advantage	1/1-2/2	130	178	0.976(0.656-1.451)	0.903519
		1/2	62	87
	Additive	-	-	-	0.989(0.704-1.390)	0.949765
	Allele	1	310	427	0.990(0.710-1.380)	0.950881
		2	74	103
RS	Model	Genotype	Case	Control	OR(95%CI)	P-value
rs3026047	Codominant	2/2	58	95	-	-
		2/1	97	129	1.232(0.810-1.874)	0.330471
		1/1	37	41	1.478(0.851-2.566)	0.164922
	Dominant	2/2	58	95	1.291(0.868-1.921)	0.20768
		2/1-1/1	134	170
	Recessive	2/2-2/1	155	224	1.304(0.799-2.127)	0.28747
		1/1	37	41
	Heterozygote Advantage	2/2-1/1	95	136	1.076(0.742-1.561)	0.697549
		2/1	97	129
	Additive	-	-	-	1.218(0.931-1.595)	0.150568
	Allele	2	213	319	1.214(0.930-1.584)	0.153479
		1	171	211
RS	Model	Genotype	Case	Control	OR(95%CI)	P-value
rs2532798	Codominant	1/1	124	170	-	-
		1/2	62	87	0.977(0.655-1.457)	0.909185
		2/2	6	8	1.028(0.348-3.039)	0.959843
	Dominant	1/1	124	170	0.981(0.666-1.446)	0.924121
		1/2-2/2	68	95
	Recessive	1/1-1/2	186	257	1.036(0.354-3.037)	0.948188
		2/2	6	8
	Heterozygote Advantage	1/1-2/2	130	178	0.976(0.656-1.451)	0.903519
		1/2	62	87
	Additive	-	-	-	0.989(0.704-1.390)	0.949765
	Allele	1	310	427	0.990(0.710-1.380)	0.950881
		2	74	103
RS	Model	Genotype	Case	Control	OR(95%CI)	P-value
rs2619103	Codominant	1/1	124	170	-	-
		1/2	62	87	0.977(0.655-1.457)	0.909185
		2/2	6	8	1.028(0.348-3.039)	0.959843
	Dominant	1/1	124	170	0.981(0.666-1.446)	0.924121
		1/2-2/2	68	95
	Recessive	1/1-1/2	186	257	1.036(0.354-3.037)	0.948188
		2/2	6	8
	Heterozygote Advantage	1/1-2/2	130	178	0.976(0.656-1.451)	0.903519
		1/2	62	87
	Additive	-	-	-	0.989(0.704-1.390)	0.949765
	Allele	1	310	427	0.990(0.710-1.380)	0.950881
		2	74	103
RS	Model	Genotype	Case	Control	OR(95%CI)	P-value
rs4081624	Codominant	2/2	58	99	-	-
		2/1	43	70	1.049(0.636-1.727)	0.852435
		1/1	1	1	1.707(0.105-27.811)	0.707277
	Dominant	2/2	58	99	1.058(0.644-1.738)	0.824446
		2/1-1/1	44	71
	Recessive	2/2-2/1	101	169	1.673(0.104-27.047)	0.716925
		1/1	1	1
	Heterozygote Advantage	2/2-1/1	59	100	1.041(0.633-1.713)	0.873794
		2/1	43	70
	Additive	-	-	-	1.070(0.662-1.731)	0.782243
	Allele	2	159	268	1.053(0.691-1.605)	0.808414
		1	45	72

## Sheet: sex=1
Table S2. logistic regression analysis of the SNPs imputated by IMPUTE2
RS	Model	Genotype	Case	Control	OR(95%CI)	P-value
rs2803820	Codominant	1/1	172	172	-	-
		1/2	95	122	0.779(0.553-1.096)	0.15105
		2/2	12	13	0.923(0.410-2.080)	0.846908
	Dominant	1/1	172	172	0.793(0.570-1.103)	0.167657
		1/2-2/2	107	135
	Recessive	1/1-1/2	267	294	1.016(0.456-2.266)	0.968244
		2/2	12	13
	Heterozygote Advantage	1/1-2/2	184	185	0.783(0.559-1.097)	0.154645
		1/2	95	122
	Additive	-	-	-	0.846(0.638-1.122)	0.245144
	Allele	1	439	466	0.854(0.649-1.123)	0.257672
		2	119	148
RS	Model	Genotype	Case	Control	OR(95%CI)	P-value
chr10:118987954:D	Codominant	1/1	172	172	-	-
		1/2	95	122	0.779(0.553-1.096)	0.15105
		2/2	12	13	0.923(0.410-2.080)	0.846908
	Dominant	1/1	172	172	0.793(0.570-1.103)	0.167657
		1/2-2/2	107	135
	Recessive	1/1-1/2	267	294	1.016(0.456-2.266)	0.968244
		2/2	12	13
	Heterozygote Advantage	1/1-2/2	184	185	0.783(0.559-1.097)	0.154645
		1/2	95	122
	Additive	-	-	-	0.846(0.638-1.122)	0.245144
	Allele	1	439	466	0.854(0.649-1.123)	0.257672
		2	119	148
RS	Model	Genotype	Case	Control	OR(95%CI)	P-value
rs2532799	Codominant	1/1	172	172	-	-
		1/2	95	122	0.779(0.553-1.096)	0.15105
		2/2	12	13	0.923(0.410-2.080)	0.846908
	Dominant	1/1	172	172	0.793(0.570-1.103)	0.167657
		1/2-2/2	107	135
	Recessive	1/1-1/2	267	294	1.016(0.456-2.266)	0.968244
		2/2	12	13
	Heterozygote Advantage	1/1-2/2	184	185	0.783(0.559-1.097)	0.154645
		1/2	95	122
	Additive	-	-	-	0.846(0.638-1.122)	0.245144
	Allele	1	439	466	0.854(0.649-1.123)	0.257672
		2	119	148
RS	Model	Genotype	Case	Control	OR(95%CI)	P-value
rs10886050	Codominant	1/1	50	72	-	-
		1/2	144	160	1.296(0.847-1.983)	0.232117
		2/2	0	0	unKnown(unKnown-unKnown)	1
	Dominant	1/1	50	72	1.296(0.847-1.983)	0.232117
		1/2-2/2	144	160
	Recessive	1/1-1/2	194	232	unKnown(unKnown-unKnown)	1
		2/2	0	0
	Heterozygote Advantage	1/1-2/2	50	72	1.296(0.847-1.983)	0.232117
		1/2	144	160
	Additive	-	-	-	1.296(0.847-1.983)	0.232117
	Allele	1	244	304	1.121(0.846-1.485)	0.424815
		2	144	160
RS	Model	Genotype	Case	Control	OR(95%CI)	P-value
rs2619102	Codominant	1/1	172	172	-	-
		1/2	95	122	0.779(0.553-1.096)	0.15105
		2/2	12	13	0.923(0.410-2.080)	0.846908
	Dominant	1/1	172	172	0.793(0.570-1.103)	0.167657
		1/2-2/2	107	135
	Recessive	1/1-1/2	267	294	1.016(0.456-2.266)	0.968244
		2/2	12	13
	Heterozygote Advantage	1/1-2/2	184	185	0.783(0.559-1.097)	0.154645
		1/2	95	122
	Additive	-	-	-	0.846(0.638-1.122)	0.245144
	Allele	1	439	466	0.854(0.649-1.123)	0.257672
		2	119	148
RS	Model	Genotype	Case	Control	OR(95%CI)	P-value
rs3026047	Codominant	2/2	85	78	-	-
		2/1	144	157	0.842(0.575-1.233)	0.375919
		1/1	50	72	0.637(0.397-1.024)	0.0624123
	Dominant	2/2	85	78	0.777(0.541-1.116)	0.172733
		2/1-1/1	194	229
	Recessive	2/2-2/1	229	235	0.713(0.476-1.068)	0.10036
		1/1	50	72
	Heterozygote Advantage	2/2-1/1	135	150	1.019(0.737-1.410)	0.908942
		2/1	144	157
	Additive	-	-	-	0.802(0.634-1.014)	0.0655445
	Allele	2	314	313	0.808(0.642-1.017)	0.0696339
		1	244	301
RS	Model	Genotype	Case	Control	OR(95%CI)	P-value
rs2532798	Codominant	1/1	172	172	-	-
		1/2	95	122	0.779(0.553-1.096)	0.15105
		2/2	12	13	0.923(0.410-2.080)	0.846908
	Dominant	1/1	172	172	0.793(0.570-1.103)	0.167657
		1/2-2/2	107	135
	Recessive	1/1-1/2	267	294	1.016(0.456-2.266)	0.968244
		2/2	12	13
	Heterozygote Advantage	1/1-2/2	184	185	0.783(0.559-1.097)	0.154645
		1/2	95	122
	Additive	-	-	-	0.846(0.638-1.122)	0.245144
	Allele	1	439	466	0.854(0.649-1.123)	0.257672
		2	119	148
RS	Model	Genotype	Case	Control	OR(95%CI)	P-value
rs2619103	Codominant	1/1	172	172	-	-
		1/2	95	122	0.779(0.553-1.096)	0.15105
		2/2	12	13	0.923(0.410-2.080)	0.846908
	Dominant	1/1	172	172	0.793(0.570-1.103)	0.167657
		1/2-2/2	107	135
	Recessive	1/1-1/2	267	294	1.016(0.456-2.266)	0.968244
		2/2	12	13
	Heterozygote Advantage	1/1-2/2	184	185	0.783(0.559-1.097)	0.154645
		1/2	95	122
	Additive	-	-	-	0.846(0.638-1.122)	0.245144
	Allele	1	439	466	0.854(0.649-1.123)	0.257672
		2	119	148
RS	Model	Genotype	Case	Control	OR(95%CI)	P-value
rs4081624	Codominant	2/2	85	82	-	-
		2/1	75	82	0.882(0.571-1.365)	0.573685
		1/1	4	6	0.643(0.175-2.362)	0.506077
	Dominant	2/2	85	82	0.866(0.564-1.330)	0.511454
		2/1-1/1	79	88
	Recessive	2/2-2/1	160	164	0.683(0.189-2.467)	0.561012
		1/1	4	6
	Heterozygote Advantage	2/2-1/1	89	88	0.904(0.588-1.390)	0.646775
		2/1	75	82
	Additive	-	-	-	0.859(0.584-1.265)	0.441621
	Allele	2	245	246	0.887(0.628-1.251)	0.492988
		1	83	94
